# Supplementary material for: Best Practices for Identifying Hospitalized Lower Respiratory Tract Infections Using Administrative Data: A Systematic Literature Review of Validation Studies
Source: Springer Nature journal article supplement (doi:10.1007/s40121-024-00949-8), 2024-03-18
Supplement: MOESM1 [file 26871972]

## Supplementary material

---

### **Best practices for identifying hospitalized lower respiratory tract infections using administrative data: a systematic literature review of validation studies**

Germaine Hanquet<sup>1</sup>, Christian Theilacker<sup>2</sup>, Jeffrey Vietri<sup>3</sup>, Ingrid Sepúlveda-Pachón<sup>1</sup>, Sonia Menon<sup>1</sup>, Bradford Gessner<sup>3</sup>, Elizabeth Begier<sup>4\*</sup>

<sup>1</sup> P95 Epidemiology & Pharmacovigilance, Koning Leopold III Laan 1, 3001 Leuven, Belgium

<sup>2</sup> Pfizer Inc., Linkstrasse 10, 10785 Berlin, Germany

<sup>3</sup> Pfizer Inc., 500 Arcola Rd, Collegeville, PA 19426, United States of America

<sup>4</sup> Pfizer Inc., 9 Riverwalk, Citywest Business Campus, Dublin 24, Dublin, Ireland

\* corresponding author, Elizabeth Begier, Scientific Affairs, Older Adult RSV Vaccine Program, Global Medical Development Scientific and Clinical Affairs, Pfizer Vaccines, 9 Riverwalk, Citywest Business Campus, Dublin 24, Dublin, Ireland, E-mail: [Elizabeth.Begier@pfizer.com](mailto:Elizabeth.Begier@pfizer.com), Phone: +353 (87) 6148075

**Supplementary table 1. PICOTS inclusion and exclusion criteria**

| Parameter           | Criteria                                                                                                                                                                                                                                                                                                                                                                                                                                                                                                                                                                                                                                                                                                                                                                                                                                                                                                                                                                                                                                                                                                                            |
|---------------------|-------------------------------------------------------------------------------------------------------------------------------------------------------------------------------------------------------------------------------------------------------------------------------------------------------------------------------------------------------------------------------------------------------------------------------------------------------------------------------------------------------------------------------------------------------------------------------------------------------------------------------------------------------------------------------------------------------------------------------------------------------------------------------------------------------------------------------------------------------------------------------------------------------------------------------------------------------------------------------------------------------------------------------------------------------------------------------------------------------------------------------------|
| <b>Population</b>   | Included: <ul style="list-style-type: none"> <li>- adults ≥18 years of age</li> </ul>                                                                                                                                                                                                                                                                                                                                                                                                                                                                                                                                                                                                                                                                                                                                                                                                                                                                                                                                                                                                                                               |
| <b>Intervention</b> | None                                                                                                                                                                                                                                                                                                                                                                                                                                                                                                                                                                                                                                                                                                                                                                                                                                                                                                                                                                                                                                                                                                                                |
| <b>Comparison</b>   | Not applicable. However, best practices for estimation of hospitalized LRTI incidence (including CAP and HAP as subgroups) using ICD codes and code-based algorithms will be assessed, including sensitivity, specificity, PPV, and/or NPV, in contrast to a gold-standard comparator such as case-by-case medical chart review.                                                                                                                                                                                                                                                                                                                                                                                                                                                                                                                                                                                                                                                                                                                                                                                                    |
| <b>Time</b>         | Publications from 1996 to present                                                                                                                                                                                                                                                                                                                                                                                                                                                                                                                                                                                                                                                                                                                                                                                                                                                                                                                                                                                                                                                                                                   |
| <b>Study design</b> | <p>Included:</p> <p>Observational epidemiological</p> <ul style="list-style-type: none"> <li>- cross-sectional</li> <li>- cohort</li> <li>- case-control</li> <li>- surveillance-based</li> <li>- and interventional studies of hospitalized LRTIs.</li> </ul> <p>Peer-reviewed studies assessing the validity of using ICD-9 and/or ICD-10 codes for the estimation of incidence rates of hospitalized LRTIs (including CAP and HAP) in the adult population, and</p> <p>Online reports/white papers (if available and/or relevant)</p> <p>Excluded:</p> <ul style="list-style-type: none"> <li>- Publications of the following type will be excluded: <ul style="list-style-type: none"> <li>o case reports</li> <li>o editorials</li> <li>o conference abstracts</li> <li>o commentaries</li> <li>o narrative reviews</li> </ul> </li> <li>- Systematic literature reviews and meta-analyses will be checked for relevant references not found during the literature search, and relevant references will be saved separately.</li> <li>- Non-human data (e.g., in-vitro, in-silico, animal models) will be excluded.</li> </ul> |
| <b>Outcome</b>      | Hospitalized, non-COVID-19 LRTI incidence rates based on ICD-9 or ICD-10 codes, including the following outcomes: <ul style="list-style-type: none"> <li>- acute and pathogen-specific bronchitis,</li> <li>- pneumonia (both CAP and HAP as subgroups).</li> </ul>                                                                                                                                                                                                                                                                                                                                                                                                                                                                                                                                                                                                                                                                                                                                                                                                                                                                 |
| <b>Country</b>      | Studies from all countries in the world are eligible                                                                                                                                                                                                                                                                                                                                                                                                                                                                                                                                                                                                                                                                                                                                                                                                                                                                                                                                                                                                                                                                                |
| <b>Language</b>     | Included: <p>English, French, Spanish, Portuguese, Dutch, German, Italian</p>                                                                                                                                                                                                                                                                                                                                                                                                                                                                                                                                                                                                                                                                                                                                                                                                                                                                                                                                                                                                                                                       |

CAP, community-acquired pneumonia; HAP, hospital-acquired pneumonia; ICD, international classification of diseases; LRTI, lower respiratory tract infection; NPV, negative predictive value; PPV, positive predictive value

Supplementary table 2

**Supplementary table 2. Search strategy**

| Search string                                                                                                                                                                                                                                                                                                                                                                                                                                                                                                                                                                                                                                                                                                                                                                                                                                                                                                                                                                                                                                                                                                                                                                                                                                                                                    | Number of hits |
|--------------------------------------------------------------------------------------------------------------------------------------------------------------------------------------------------------------------------------------------------------------------------------------------------------------------------------------------------------------------------------------------------------------------------------------------------------------------------------------------------------------------------------------------------------------------------------------------------------------------------------------------------------------------------------------------------------------------------------------------------------------------------------------------------------------------------------------------------------------------------------------------------------------------------------------------------------------------------------------------------------------------------------------------------------------------------------------------------------------------------------------------------------------------------------------------------------------------------------------------------------------------------------------------------|----------------|
| <p>((((((((((Bronchitis OR (Bronchitis[MeSH Terms])) OR (lower respiratory tract infection)) OR (lower respiratory tract infection[MeSH Terms])) OR ("LRTI")) OR (pneumonia)) OR (pneumonia[MeSH Terms])) OR (community acquired pneumonia[MeSH Terms])) OR (pneumonia hospitalizations[MeSH Terms])) AND (((((((((((International Classification of Diseases) OR (International Classification of Diseases[MeSH Terms])) OR (ICD)) OR (ICD code*)) OR (ICD code*[MeSH Terms])) OR (ICD-9-CM)) OR (ICD-10-CM)) OR (ICD-9)) OR (ICD-10)) OR (coding)) OR (coding[MeSH Terms])) OR (clinical coding)) OR (clinical coding[MeSH Terms])) OR (claim*)) OR (administrative data))) AND (((((((((((accuracy) OR (data accuracy)) OR (sensitivity)) OR (sensitivity[MeSH Terms])) OR (specificity)) OR (specificity[MeSH Terms])) OR (validation)) OR (validated)) OR (predictive value of tests)) OR (positive predictive value)) OR (positive predictive value[MeSH Terms])) OR (negative predictive value)) OR (negative predictive value[MeSH Terms])) OR (algorithm*)) OR (algorithm*[MeSH Terms]))) AND (((((((hospitalization) OR (hospitalization[MeSH Terms])) OR (inpatient)) OR (inpatient[MeSH Terms])) OR (admission*)) OR (admission*[MeSH Terms]))) NOT ((SARS-CoV-2) OR (COVID-19))</p> | <p>1807</p>    |

**Supplementary table 3. Quality Assessment of Diagnostic Accuracy Studies 2 (QUADAS-2) adapted tool with domain criteria**

| Domain |                                                                                               | Criteria                                                                                                                                                                                       | Classification        |
|--------|-----------------------------------------------------------------------------------------------|------------------------------------------------------------------------------------------------------------------------------------------------------------------------------------------------|-----------------------|
| 1      | <b>Could the selection of patients have introduced bias?</b>                                  | Was a systematic sampling of patients enrolled used?                                                                                                                                           | Yes, No, Unclear (NR) |
|        |                                                                                               | Did the study avoid inappropriate exclusions?                                                                                                                                                  | Yes, No, Unclear (NR) |
| 2      | <b>Could the conduct or interpretation of the index test have introduced bias?</b>            | Were the index test results interpreted without knowledge of the results of the reference standard?                                                                                            | Yes, No, Unclear (NR) |
|        |                                                                                               | Does the study avoid restricting to primary coding position only?                                                                                                                              | Yes, No, Unclear (NR) |
|        |                                                                                               | Does the study avoid changes in coding practices or guidelines during the study period?                                                                                                        | Yes, No, Unclear (NR) |
| 3a     | <b>Could the reference standard, its conduct, or its interpretation have introduced bias?</b> | Is the reference standard likely to correctly identify the target condition?                                                                                                                   | Yes, No, Unclear (NR) |
|        |                                                                                               | Were the reference standard results interpreted without knowledge of the results of the index test?                                                                                            | Yes, No, Unclear (NR) |
| 3b     | <b>Applicability</b>                                                                          | Are there concerns that the target condition as defined by the reference standard does not match the question? Does the study differentiate between CAP and HAP or was about only one of them? | Low, High, or Unclear |
| 4      | <b>Could the patient flow have introduced bias?</b>                                           | Did all patients receive the same reference standard?                                                                                                                                          | Yes, No, Unclear (NR) |
|        |                                                                                               | Were all patients included in the analysis?                                                                                                                                                    | Yes, No, Unclear (NR) |

CAP, community-acquired pneumonia; HAP, hospital-acquired pneumonia; NR, not reported

## Supplementary table 4

## Supplementary table 4. Description of included studies

| Reference<br>(first author, year)               | Country   | Population description                                                                                                                                                   | Age group<br>(years) | Data source                                                                                                        | Study period | ICD coding system | Reference standard                                                        | Number of cases                                             | Total sample size |
|-------------------------------------------------|-----------|--------------------------------------------------------------------------------------------------------------------------------------------------------------------------|----------------------|--------------------------------------------------------------------------------------------------------------------|--------------|-------------------|---------------------------------------------------------------------------|-------------------------------------------------------------|-------------------|
| <b>Lower respiratory tract infection (LRTI)</b> |           |                                                                                                                                                                          |                      |                                                                                                                    |              |                   |                                                                           |                                                             |                   |
| Henriksen, 2014 [1]                             | Denmark   | All patients admitted to the medical ED of a university hospital <sup>a</sup>                                                                                            | ≥15                  | EMR in administrative database <sup>b</sup> , national health register <sup>c</sup> , other databases <sup>d</sup> | 2010-2011    | ICD-10            | Review of medical files                                                   | 1368                                                        | 5977              |
| Rattanaumpawan, 2016 [2]                        | Thailand  | Adult patients hospitalized in general medicine wards                                                                                                                    | ≥15                  | Siriraj Hospital database                                                                                          | 2013         | ICD-10            | Review of medical files                                                   | 441                                                         | 546               |
| <b>Pneumonia (overall)</b>                      |           |                                                                                                                                                                          |                      |                                                                                                                    |              |                   |                                                                           |                                                             |                   |
| Aronsky, 2005 [3]                               | USA       | Adult patients seen in the ED of a hospital <sup>e</sup>                                                                                                                 | ≥18                  | CDSS                                                                                                               | 1999-2000    | ICD-9             | Review of medical files, coding, radiology, and physician diagnosis       | 129 (algorithm 1)<br>159 (algorithm 2)<br>164 (algorithm 3) | NR                |
| Skull, 2008 [4]                                 | Australia | Patients in two major teaching hospitals <sup>f</sup>                                                                                                                    | ≥65                  | Monthly separation lists of completed admissions for patients                                                      | 2000-2002    | ICD-10            | Review of medical files and radiological data                             | 2319                                                        | 5101              |
| Ahmed, 2014 [5]                                 | USA       | Patients, not prisoners or pregnant women                                                                                                                                | ≥18                  | Study for ALI/ARDS prevention subset. EMR, other databases <sup>g</sup>                                            | 2010         | ICD-9             | Review of medical files, coding                                           | 122                                                         | 1443              |
| Holland-Bill, 2014 [6]                          | Denmark   | Inpatients at a university hospital <sup>g</sup> , with a primary discharge diagnosis of a preselected infectious condition and history of solid malignancy <sup>h</sup> | ≥18                  | Medical records <sup>i</sup> and national health register <sup>c</sup>                                             | 2006-2010    | ICD-10            | Review of medical files, PGA, and confirmation by evidence-based criteria | 95                                                          | 95                |
| Kern, 2015 [7]                                  | USA       | Claims data for commercially insured individuals                                                                                                                         | ≥40                  | HealthCore Integrated Research Environment                                                                         | 2009-2012    | ICD-9             | Review of medical files                                                   | 185                                                         | 185               |
| Higgins, 2020 [8]                               | USA       | Patients with pneumonia diagnosis and atypical bacterial or viral pathogens test results                                                                                 | ≥18                  | 178 U.S. hospitals Premier Healthcare Database                                                                     | 2010-2015    | ICD-9             | Laboratory data                                                           | 21041                                                       | 161529            |
| <b>Empyema</b>                                  |           |                                                                                                                                                                          |                      |                                                                                                                    |              |                   |                                                                           |                                                             |                   |
| Søgaard, 2011 [9]                               | Denmark   | Patients diagnosed with pleural empyema in the North Denmark Region                                                                                                      | ≥15                  | Danish Civil Registry System and national health register <sup>c</sup>                                             | 2000-2009    | ICD-10            | Review of medical files (clinical, radiology and laboratory data)         | 149                                                         | 149               |

Supplementary table 4

| Reference<br>(first author, year)         | Country         | Population description                                                                                                            | Age<br>group<br>(years) | Data source                                                                         | Study<br>period | ICD<br>coding<br>system | Reference standard                                                                      | Number of cases | Total<br>sample<br>size |
|-------------------------------------------|-----------------|-----------------------------------------------------------------------------------------------------------------------------------|-------------------------|-------------------------------------------------------------------------------------|-----------------|-------------------------|-----------------------------------------------------------------------------------------|-----------------|-------------------------|
| <b>Community-acquired pneumonia (CAP)</b> |                 |                                                                                                                                   |                         |                                                                                     |                 |                         |                                                                                         |                 |                         |
| Whittle,<br>1997 [10]                     | USA             | All discharges from a university hospital <sup>j</sup>                                                                            | ≥18                     | Discharge summaries, dictated admission notes, and radiology reports                | 1989-1990       | ICD-9                   | Review of medical files (clinical and radiology data)                                   | 144             | 144                     |
| Guevara,<br>1999 [11]                     | USA             | Adults hospitalized for pneumonia in 15 acute-care hospitals in two counties <sup>k</sup>                                         | ≥18                     | Community-based pneumonia incidence study                                           | 1991-1992       | ICD-9                   | Clinical data, radiological and microbiologic data                                      | 4385            | NR                      |
| Schneeweiss,<br>2007 [12]                 | USA             | Patients at Department of Veteran's Affairs hospitals in New England                                                              | ≥18                     | Department of Veterans Affairs administrative database, EMR                         | 2001-2004       | ICD-9                   | Diagnostic criteria and the final ID specialist criteria of the gold-standard diagnosis | 23              | 23                      |
| van de Garde,<br>2007 [13]                | The Netherlands | Adult inpatients for CAP in two university medical centers and five teaching hospitals                                            | ≥18                     | Data from an efficacy RCT, hospital discharge records                               | 2000-2004       | ICD-9                   | Clinical, radiological and laboratory data                                              | 293             | 293                     |
| Grijalva,<br>2008 [14]                    | USA             | Patients diagnosed with rheumatoid arthritis                                                                                      | ≥18                     | Tennessee Medicaid (TennCare) databases                                             | 1995-2004       | ICD-9                   | Review of medical files                                                                 | 161             | 161                     |
| Yu,<br>2011 [15]                          | USA             | Persons with outpatient medical encounters and hospitalizations with a pneumonia ICD-9-CM code <sup>l</sup>                       | ≥18                     | Administrative data systems                                                         | 1997-2005       | ICD-9                   | Review of medical files                                                                 | 2525            | 3839                    |
| Mukhopadhyay,<br>2017 [16]                | Singapore       | Adults hospitalized with CAP at a university hospital <sup>m</sup>                                                                | ≥21                     | EMR-linked administrative data                                                      | 2010-2012       | ICD-9                   | Clinical and radiological data                                                          | 100             | 200                     |
| Jones,<br>2018 [17]                       | USA             | Visits to USA Veteran's Affairs EDs with a chest imaging and at least one clinical document generated within 24 of the visit time | ≥18                     | The Veterans Informatics and Computing Infrastructure                               | 2006-2012       | ICD-9                   | Review of medical files                                                                 | 2881470         | NR                      |
| Wiese,<br>2018 [18]                       | USA             | Adults enrolled in the Tennessee Medicaid healthcare program                                                                      | 50-110                  | Tennessee Hospital Discharge Data System, pharmacy information from Medicare part D | 2008-2012       | ICD-9                   | Review of medical files and radiological data                                           | 340             | 340                     |
| Rodriguez-Barradas,<br>2020 [19]          | USA             | Patient of VACS cohort (with or without HIV) whose first CAP hospitalization was based on ICD-9 codes after enrollment            | ≥18                     | VACS database                                                                       | 2002-2008       | ICD-9                   | Review of medical files                                                                 | 549             | 549                     |

Supplementary table 4

| Reference<br>(first author, year)            | Country     | Population description                                                                                                                             | Age<br>group<br>(years) | Data source                                                | Study<br>period | ICD<br>coding<br>system | Reference standard                                                   | Number of cases | Total<br>sample<br>size |
|----------------------------------------------|-------------|----------------------------------------------------------------------------------------------------------------------------------------------------|-------------------------|------------------------------------------------------------|-----------------|-------------------------|----------------------------------------------------------------------|-----------------|-------------------------|
| <b>Any hospital-acquired pneumonia (HAP)</b> |             |                                                                                                                                                    |                         |                                                            |                 |                         |                                                                      |                 |                         |
| Romano, 2002 [20]                            | USA         | Patients, discharged from a nonfederal acute-care hospital after an inpatient lumbar surgery                                                       | ≥18                     | Medical records, hospital discharge abstracts <sup>n</sup> | 1990-1991       | ICD-9                   | Recoding based on medical files review and ICD manual                | 4               | 991                     |
| Quan, 2004 [21]                              | Canada      | Inpatients discharged from general medical and general surgical services of three adult acute-care hospitals in Calgary, Alberta                   | ≥18                     | Regional hospital administrative discharge data            | 1996-1997       | ICD-10                  | Review of medical files                                              | 88              | 1200                    |
| Azaouagh, 2008 [22]                          | Germany     | Inpatients at a university hospital <sup>o</sup>                                                                                                   | ≥18                     | University hospital database                               | 2005            | ICD-10                  | Review of medical files (clinical, radiological and laboratory data) | NR              | 3000                    |
| Maass, 2015 [23]                             | Germany     | Patients with a minimum hospitalization of 5 days                                                                                                  | ≥65                     | Hospital administrative database                           | 2010            | ICD-10                  | Review of medical files                                              | 2876            | NR                      |
| Wolfensberger, 2018 [24]                     | Switzerland | Patients assigned to the proxy code U69.00 as having a HAP according to ICD-10 definition criteria (ICD-HAP) at a university hospital <sup>p</sup> | ≥18                     | University hospital database, medical records              | 2016            | ICD-10                  | Reviewing medical files (Clinical, radiological and laboratory data) | 165             | 159                     |
| <b>Ventilator-associated pneumonia (VAP)</b> |             |                                                                                                                                                    |                         |                                                            |                 |                         |                                                                      |                 |                         |
| Verelst, 2010[25]                            | Belgium     | Adult non-obstetric patients                                                                                                                       | ≥16                     | Belgian Hospital Discharge Dataset                         | 2004-2006       | ICD-9                   | Review of medical files                                              | 58              | 763                     |
| Cass, 2013 [26]                              | USA         | Patients on the medical/surgical, neuro/trauma, cardiovascular, or coronary care ICUs during their hospital stay                                   | ≥18                     | Administrative and hospital surveillance data <sup>q</sup> | 2009            | ICD-9                   | Hospital surveillance data                                           | 427             | 1500                    |

ALI/ARDS, acute lung injury/acute respiratory distress syndrome; CAP, community-acquired pneumonia; CDSS, computerized decision support system; CT, computed tomography; ED, emergency department; EMR, electronic medical records; HAP, hospital-acquired pneumonia; HIV, human immunodeficiency virus; ICD, international classification of diseases; ICU, intensive care unit; ID, infection diseases; IV, intravenous; LRTI, lower respiratory tract infection; NR, not specified in the article; PGA, physician global assessment; RCT, randomized clinical trial; USA, United States of America; VACS, Veterans Aging Cohort Study; VAP, ventilator-associated pneumonia; <sup>a</sup> Odense University Hospital, Denmark; <sup>b</sup> Funen Patient Administrative System; <sup>c</sup> Danish National Patient Register; <sup>d</sup> Odense Pharmacoepidemiological Database, the Danish National Cancer Register, and the Danish National Alcohol- and Drug Treatment Register; <sup>e</sup> LDS Hospital in Salt Lake City, Utah; <sup>f</sup> Royal Melbourne Hospital and Western Hospital Footscray; <sup>g</sup> Aalborg University Hospital; <sup>h</sup> The population was restricted to patients with a history of a solid malignancy ( ICD-10 codes C00eC79, excluding nonmelanoma skin cancer code C44) within 5 years before the admission with an infection; <sup>i</sup> Aalborg University Hospital medical records; <sup>j</sup> Presbyterian University Hospital; <sup>k</sup> Franklin and Summit, Ohio; <sup>l</sup> ICD-9 codes 480–487.0 and 507.0; <sup>m</sup> National University Hospital; <sup>n</sup> California Office of Statewide Health Planning and Development Patient Discharge Data Set; <sup>o</sup> University Hospital Essen; <sup>p</sup> University Hospital Zurich; <sup>q</sup> Greenville Memorial Hospital, the 3M Health Information Systems ClinTrac Abstracting Module; <sup>r</sup> Mayo Clinic Life Sciences System, The Multidisciplinary Epidemiology and Translational Research in Intensive Care (METRIC) datamart

**Supplementary table 5. Results of the risk of bias assessment, QUADAS-2 adapted tool**

|                               | Patient selection | Index test | Reference standard | Flow and timing |
|-------------------------------|-------------------|------------|--------------------|-----------------|
| Skull, 2008-1 [4]             | Low               | Low        | Low                | High            |
| Skull, 2008-2 [4]             | Low               | Low        | High               | Low             |
| Skull, 2008-3 [4]             | Low               | Low        | Low                | High            |
| Wiese, 2018-1 [18]            | Low               | High       | Low                | Low             |
| Wiese, 2018-2 [18]            | Low               | High       | Low                | High            |
| Jones, 2018 [17]              | Low               | Low        | Low                | Low             |
| Rodriguez-Barradas, 2020 [19] | Unclear           | Low        | Low                | Low             |
| Wolfensberger, 2018 [24]      | Low               | Unclear    | Low                | Low             |
| Yu, 2011 [15]                 | High              | Low        | Low                | Low             |
| Verelst, 2010 [25]            | Low               | Low        | Unclear            | Low             |
| Søgaard, 2011 [9]             | Low               | Low        | Unclear            | Low             |
| Quan, 2004 [21]               | Low               | Unclear    | Unclear            | Low             |
| Mukhopadhyay, 2017 [16]       | Low               | Unclear    | Low                | High            |
| Maass, 2015 [23]              | Low               | Low        | Low                | Low             |
| Rattanaumpawan, 2016 [2]      | Low               | Unclear    | Unclear            | Low             |
| Kern, 2015 [7]                | Low               | Unclear    | Unclear            | Low             |
| Henriksen, 2014 [1]           | Low               | Low        | Low                | Low             |
| Aronsky, 2005 [3]             | Low               | Unclear    | Unclear            | Low             |
| Ahmed, 2014 [5]               | Unclear           | Unclear    | High               | Low             |
| Schneeweiss, 2007 [12]        | Low               | High       | Low                | Low             |
| Holland-Bill, 2014-1 [6]      | Low               | High       | Low                | Low             |
| Holland-Bill, 2014-2 [6]      | Low               | High       | Low                | Low             |
| van de Garde, 2007 [13]       | Low               | Unclear    | Unclear            | Low             |
| Grijalva, 2008 [14]           | High              | Low        | Low                | Low             |
| Cass, 2013 [26]               | Low               | High       | Unclear            | Low             |
| Higgins, 2020 [8]             | Low               | Unclear    | Unclear            | Low             |
| Azaouagh, 2008 [22]           | High              | Unclear    | Low                | Low             |
| Guevara, 1999 [11]            | Low               | Low        | Unclear            | High            |
| Whittle, 1997 [10]            | Low               | Low        | Low                | Low             |
| Romano, 2002 [20]             | Low               | Unclear    | Unclear            | Low             |



Supplementary table 6

**Supplementary table 6. Characteristics and validation measures of ICD algorithms to diagnose LRTI in adults**

1°/2°, primary/secondary; (#) "secondary position" (i.e., 2°) means in *any* secondary position, not only in the second *place*; \* Coding position in most cases refers to "Classical pneumonia codes position", but sometimes to other pneumonia-related codes; ALI/ARDS, acute lung injury/acute respiratory distress syndrome; ARF, acute respiratory failure; B-HDDS, Belgian Hospital Discharge Dataset; CAP, community-acquired pneumonia; CART, classification and regression tree analysis to identify true CAP cases; CDC, Centers for Disease Control and Prevention; COPD, chronic obstructive pulmonary disease; ED: emergency department; EHR, electronic health record; EMR, electronic medical record; HAP: hospital-acquired pneumonia; HELICS, the Hospitals in Europe Link for Infection Control through Surveillance; HIV, human immunodeficiency virus; HOSP, hospital; ICD, international classification of diseases; ICU, intensive care unit; LOS, length of hospital stay; LR+: Likelihood ratio positive; LR-: Likelihood ratio negative; LRTI, lower respiratory tract infection; MCLSS, Mayo Clinic Life Sciences System; NL, the Netherlands; NLP, natural language processing; NPV, negative predictive value; OSHPD, Office of Statewide Health Planning and Development; POA, present on admission; PPV, positive predictive value; Se, sensitivity; Sp, specificity; USA, United States of America; VA, veterans affairs; VACS, Veterans Aging Cohort Study; VAP, ventilator-associated pneumonia; VINCI, The Veterans Informatics and Computing Infrastructure

| Country, reference          | Study period      | Data source (coding timing)                                                           | Algorithm             | Coding position * | Codes <sup>1</sup><br>Classical pneumonia codes<br>Aspiration pneumonia codes<br>Other specific infection codes<br>Related to respiratory system codes<br>Latrogen/Complication codes                                                                                                                                                                                                                                                                                                                                                                                                                                                                                                                                                                                                               | Reference standard                                   | Treatment |                                                    | Population | Se (%) | Sp (%) | PPV (%) | NPV (%) | LR+           | LR-           |
|-----------------------------|-------------------|---------------------------------------------------------------------------------------|-----------------------|-------------------|-----------------------------------------------------------------------------------------------------------------------------------------------------------------------------------------------------------------------------------------------------------------------------------------------------------------------------------------------------------------------------------------------------------------------------------------------------------------------------------------------------------------------------------------------------------------------------------------------------------------------------------------------------------------------------------------------------------------------------------------------------------------------------------------------------|------------------------------------------------------|-----------|----------------------------------------------------|------------|--------|--------|---------|---------|---------------|---------------|
|                             |                   |                                                                                       |                       |                   |                                                                                                                                                                                                                                                                                                                                                                                                                                                                                                                                                                                                                                                                                                                                                                                                     |                                                      | set-ting  | Time frame                                         |            |        |        |         |         |               |               |
| <b>LRTI</b>                 |                   |                                                                                       |                       |                   |                                                                                                                                                                                                                                                                                                                                                                                                                                                                                                                                                                                                                                                                                                                                                                                                     |                                                      |           |                                                    |            |        |        |         |         |               |               |
| <b>ICD-10</b>               |                   |                                                                                       |                       |                   |                                                                                                                                                                                                                                                                                                                                                                                                                                                                                                                                                                                                                                                                                                                                                                                                     |                                                      |           |                                                    |            |        |        |         |         |               |               |
| Denmark, Henriksen 2014 [1] | 09/2010 - 08/2011 | Electronic patient journal, large population-based registers <sup>2</sup> (discharge) | ICD-10 codes for LRTI | Any               | <b>Codes<sup>1</sup>:</b> A31.0A, A48.1, B37.1, J12.0, J13.9, J14.9, J15, J15.0, J15.1, J15.2, J15.4, J15.5, J15.7, J15.8, J15.9, J17.0, J17.8, J18, J18.0, J18.1, J18.8, J18.9, J20.9, J20.9A, J21.9, J22.9, J69.0, J69.8, J69.8A <b>Other:</b> A15.0, A15.1, A15.2, A15.9, B90.9, J40.9, J44.0, J85.1, J85.2, J86.0, J86.9<br><b>Classical pneumonia codes:</b> J12.0, J13, J14, J15.0-J15.9, J16.0, J17.0, J17.8, J18, J18.0, J18.1, J18.8, J18.9s<br><b>Aspiration pneumonia codes:</b> J69.0, J69.8, J69.8A<br><b>Other specific infection codes:</b> A15.0, A15.1, A15.2, A15.9, A31.0, A48.1, B37.1, B90.9, J22<br><b>Related to respiratory system codes:</b> J85.2 <sup>3</sup> , J85.1 <sup>4</sup> , (J20.9, J21.9, J40) <sup>5</sup> , J44.0 <sup>6</sup> , (J86.0, J86.9) <sup>7</sup> | Review of clinical, radiological and laboratory data | ED        | Identified in the first 48h of the admission to ED | ≥15 yrs    | 71     | 92     | 71      | 91      | 8.3 (7.5-9.2) | 0.3 (0.3-0.4) |

<sup>1</sup> All the codes included in the paper without classification (codes list)

<sup>2</sup> Funen Patient Administrative System, Danish National Patient Register, Odense Pharmacoepidemiological Database, the laboratory information system at Department of Clinical Microbiology at Odense University Hospital, the Danish National Cancer Register, as well as the Danish National Alcohol- and Drug Treatment Register

<sup>3</sup> Lung abscess without pneumonia

<sup>4</sup> Lung abscess with pneumonia

<sup>5</sup> Bronchitis codes

<sup>6</sup> COPD with LRTI (except influenza)

<sup>7</sup> Pyothorax codes

Supplementary table 6

| Country, reference                 | Study period      | Data source (coding timing)            | Algorithm                                    | Coding position * | Codes <sup>1</sup><br>Classical pneumonia codes<br>Aspiration pneumonia codes<br>Other specific infection codes<br>Related to respiratory system codes<br>latrogen/Complication codes                                                                                                                                                                                                                                                                                                                                                                                                                                                                                                                                                                                             | Reference standard                     | Treatment setting | Time frame                           | Population | Se (%) | Sp (%) | PPV (%) | NPV (%) | LR+  | LR-  |
|------------------------------------|-------------------|----------------------------------------|----------------------------------------------|-------------------|-----------------------------------------------------------------------------------------------------------------------------------------------------------------------------------------------------------------------------------------------------------------------------------------------------------------------------------------------------------------------------------------------------------------------------------------------------------------------------------------------------------------------------------------------------------------------------------------------------------------------------------------------------------------------------------------------------------------------------------------------------------------------------------|----------------------------------------|-------------------|--------------------------------------|------------|--------|--------|---------|---------|------|------|
|                                    |                   |                                        |                                              |                   |                                                                                                                                                                                                                                                                                                                                                                                                                                                                                                                                                                                                                                                                                                                                                                                   |                                        |                   |                                      |            |        |        |         |         |      |      |
| Thailand, Rattanaum-pawan 2016 [2] | 02/2013 - 05/2013 | Siriraj Hospital database (not stated) | ICD-10 codes for infectious conditions- LRTI | Any               | <b>Codes<sup>1</sup>:</b> A15-A16, A19, A150-153, A157-162, A167-169, A202, A221, A310, A420, A430, A481 B012, B052, B206, B250, B334, B371, B380-382, B390-392, B400-402, B410, B420, B440-441, B450, B460, B583, B59, B671 J100, J110, J160, J12-18, J120-123, J128-129, J150-159, J168, J180-182, J188-189. P23, P230-239<br><b>Classical pneumonia codes:</b> J10, J11.0, J12.0, J12.1, J12.2, J12.3, J12.8, J12.9, J13, J14, J15.0- J15.7, J15.8, J15.9, J16.0, J16.8, J17.0, J17.1, J17.2, J17.3, J17.8, J18*<br><b>Other specific infection codes:</b> A15*-A16*, A19*, A20.2, A22.1, A31.0, A42.0, A43.0, A48.1, B01.2, B05.2, B20.6, B25.0, B33.4, B37.1, B38.0, B38.1, B38.2, B39.0-B392, B400-B402, B410, B420, B440-441, B450, B460, B58.3, B59, B67.1, P23, P230-239 | Review of clinical and laboratory data | HOSP              | Admission and during hospitalization | ≥15 yrs    | 57     | 94     | 84      |         | 8.80 | 0.46 |

**Pneumonia (overall)**

**ICD-9**

|                       |                           |                                                   |                          |                                                                                                                                                                                                                                                                                                                                                                                                                                                                                                                                                                       |                                                                                                      |                                                       |                   |         |    |    |    |       |       |      |
|-----------------------|---------------------------|---------------------------------------------------|--------------------------|-----------------------------------------------------------------------------------------------------------------------------------------------------------------------------------------------------------------------------------------------------------------------------------------------------------------------------------------------------------------------------------------------------------------------------------------------------------------------------------------------------------------------------------------------------------------------|------------------------------------------------------------------------------------------------------|-------------------------------------------------------|-------------------|---------|----|----|----|-------|-------|------|
| USA, Aronsky 2005 [3] | 11/1999 - 04/2000         | Computerized decision support system (not stated) | Algorithm 1 <sup>8</sup> | 1°                                                                                                                                                                                                                                                                                                                                                                                                                                                                                                                                                                    | <b>Codes<sup>1</sup>:</b> 480-483; 485-487.0<br><b>Classical pneumonia codes:</b> 480-483; 485-487.0 | Review of clinical and radiological data and recoding | HOSP <sup>9</sup> | ≥18 yrs | 55 | 99 | 85 | 96    | 60.89 | 0.46 |
|                       | Algorithm 2 <sup>10</sup> |                                                   | 1°                       | <b>Codes<sup>1</sup>:</b> 3.22, 21.2, 39.1, 52.1, 55.1, 73.0, 112.4, 114.0, 115.05, 115.15, 115.95, 130.4, 136.3, 480, 480.0, 480.1, 480.2, 480.8, 480.9, 481, 482, 482.0, 482.1, 482.2, 482.3, 482.4, 482.8, 482.9, 483, 484.1, 484.3, 484.5, 484.6, 484.7, 484.8, 485, 486, 487, 507.0, 510.0, 510.9, 511.1, 513.0<br><b>Classical pneumonia codes:</b> 480, 480.0, 480.1, 480.2, 480.8, 480.9, 481, 482, 482.0, 482.1, 482.2, 482.3, 482.4, 482.8, 482.9, 483, 484.1, 484.3, 484.5, 484.6, 484.7, 484.8, 485, 486, 487<br><b>Aspiration pneumonia codes:</b> 507.0 | 68                                                                                                   |                                                       |                   |         | 99 | 86 | 97 | 68.30 | 0.32  |      |

<sup>8</sup> A limited set of frequently used ICD-9 codes

<sup>9</sup> It does not make distinction between CAP and HAP

<sup>10</sup> ICD-9 codes for a wide spectrum of possible pneumonia cases

Supplementary table 6

| Country, reference  | Study period      | Data source (coding timing)                             | Algorithm                    | Coding position *          | Codes <sup>1</sup><br>Classical pneumonia codes<br>Aspiration pneumonia codes<br>Other specific infection codes<br>Related to respiratory system codes<br>latrogen/Complication codes                                                                                                                                                                                                                                                                                                                                                                | Reference standard                                                                    | Treatment setting | Time frame            | Population | Se (%) | Sp (%) | PPV (%) | NPV (%) | LR+   | LR-  |
|---------------------|-------------------|---------------------------------------------------------|------------------------------|----------------------------|------------------------------------------------------------------------------------------------------------------------------------------------------------------------------------------------------------------------------------------------------------------------------------------------------------------------------------------------------------------------------------------------------------------------------------------------------------------------------------------------------------------------------------------------------|---------------------------------------------------------------------------------------|-------------------|-----------------------|------------|--------|--------|---------|---------|-------|------|
|                     |                   |                                                         |                              |                            |                                                                                                                                                                                                                                                                                                                                                                                                                                                                                                                                                      |                                                                                       |                   |                       |            |        |        |         |         |       |      |
|                     |                   |                                                         |                              |                            | <b>Other specific infection codes:</b> 3.22, 21.2, 39.1, 52.1, 55.1, 73.0, 112.4, 114.0, 115.05, 115.15, 115.95, 130.4, 136.3<br><b>Related to respiratory system codes:</b> (510.0, 510.9) <sup>11</sup> , (511.1, 513.0) <sup>12</sup>                                                                                                                                                                                                                                                                                                             |                                                                                       |                   |                       |            |        |        |         |         |       |      |
|                     |                   |                                                         | Algorithm 3 <sup>13</sup>    | 1° or 2° (#) <sup>14</sup> | <b>Codes<sup>1</sup>:</b> 480-483; 485-487.0, 507 as 1° diagnosis; or 518.8*, 038*, as 1° diagnosis and 480-483; 485-487.0 as 2° (#) diagnosis<br><b>Classical pneumonia codes:</b> 480-483; 485-487.0<br><b>Aspiration pneumonia codes:</b> 507.0<br><b>Other specific infection codes:</b> 038* <sup>15</sup><br><b>Related to respiratory system codes:</b> 518.8 <sup>12</sup>                                                                                                                                                                   |                                                                                       |                   |                       |            | 70     | 99     | 85      | 97      | 63.45 | 0.31 |
| USA, Ahmed 2014 [5] | 01/2010 - 12/2010 | EMRs <sup>16</sup> , data from the MCLSS (admission)    | ICD-9 codes for pneumonia    | Not stated, likely any     | <b>Codes<sup>1</sup>:</b> 480.0, 480.1, 480.2, 480.3, 480.8, 480.9, 481, 482.0, 482.1, 482.2, 482.30, 482.31, 482.32, 482.39, 482.40, 482.41, 482.49, 482.81, 482.82, 482.83, 482.89, 482.9, 483.0, 483.1, 483.8, 484.1, 484.3, 484.5, 484.6, 484.7, 484.8, 485, 486<br><b>Classical pneumonia codes:</b> 480.0, 480.1, 480.2, 480.3, 480.8, 480.9, 481, 482.0, 482.1, 482.2, 482.30, 482.31, 482.32, 482.39, 482.40, 482.41, 482.49, 482.81, 482.82, 482.83, 482.89, 482.9, 483.0, 483.1, 483.8, 484.1, 484.3, 484.5, 484.6, 484.7, 484.8, 485, 486 | Agreement between the 3 tested algorithms and review of medical files when discordant | HOSP <sup>9</sup> | ≥18 yrs <sup>17</sup> | 77         | 98     | 78     | 98      | 38.50   | 0.23  |      |
| USA, Kern 2015 [7]  | 03/2009 - 03/2012 | HealthCore Integrated Research Environment (not stated) | ICD-9-CM codes for pneumonia | Any                        | <b>Codes<sup>1</sup>:</b> 480.xx-486.xx<br><b>Classical pneumonia codes:</b> 480.xx-486.xx                                                                                                                                                                                                                                                                                                                                                                                                                                                           | Review of medical files                                                               | HOSP <sup>9</sup> | ≥40 yrs <sup>18</sup> |            |        | 88     |         |         |       |      |

<sup>11</sup> Empyema codes

<sup>12</sup> Other unspecified pneumonia-related codes

<sup>13</sup> Adds codes to algorithm 1 that are representative of severe pneumonia (e.g., sepsis or respiratory failure in a pneumonia patient) and are similar to the case identification algorithm for the pneumonia ORYX core measure by the Joint Commission on Accreditation of Healthcare Organizations

<sup>14</sup> if 1° is sepsis or respiratory failure

<sup>15</sup> Sepsis (if pneumonia 2° (#))

<sup>16</sup> The Multidisciplinary Epidemiology and Translational Research in Intensive Care (METRIC) datamart

<sup>17</sup> A subset of an ongoing prospective study for ALI/ARDS prevention

<sup>18</sup> With COPD

Supplementary table 6

| Country, reference             | Study period      | Data source (coding timing)                                                             | Algorithm                                                      | Coding position * | Codes <sup>1</sup><br>Classical pneumonia codes<br>Aspiration pneumonia codes<br>Other specific infection codes<br>Related to respiratory system codes<br>Iatrogen/Complication codes | Reference standard                                     | Treatment setting | Time frame                        | Population            | Se (%) | Sp (%) | PPV (%) | NPV (%) | LR+  | LR- |
|--------------------------------|-------------------|-----------------------------------------------------------------------------------------|----------------------------------------------------------------|-------------------|---------------------------------------------------------------------------------------------------------------------------------------------------------------------------------------|--------------------------------------------------------|-------------------|-----------------------------------|-----------------------|--------|--------|---------|---------|------|-----|
|                                |                   |                                                                                         |                                                                |                   |                                                                                                                                                                                       |                                                        |                   |                                   |                       |        |        |         |         |      |     |
| <b>ICD-10</b>                  |                   |                                                                                         |                                                                |                   |                                                                                                                                                                                       |                                                        |                   |                                   |                       |        |        |         |         |      |     |
| Australia, Skull 2008 [4]      | 04/2000 - 03/2002 | Monthly separation lists of completed admissions for patients <sup>19</sup> (admission) | ICD-10-AM codes for pneumonia <sup>20</sup>                    | Any <sup>21</sup> | Codes <sup>1</sup> : J10-J18<br>Classical pneumonia codes: J10-J18                                                                                                                    | Radio-logical data                                     | HOSP <sup>9</sup> | ≥65 yrs                           | 89                    | 62     | 71     | 84      | 2.35    | 0.17 |     |
|                                |                   |                                                                                         |                                                                |                   |                                                                                                                                                                                       |                                                        |                   |                                   | 98                    | 97     | 96     | 98      | 31.55   | 0.02 |     |
|                                |                   |                                                                                         |                                                                |                   |                                                                                                                                                                                       |                                                        |                   |                                   | 98                    | 64     | 68     | 97      | 2.73    | 0.03 |     |
| Denmark, Holland-Bill 2014 [6] | 01/2006 - 12/2010 | DNRP, Aalborg University Hospital medical records (discharge)                           | Diagnostic codes according to the Danish version of the ICD-10 | 1 <sup>o</sup>    | Codes <sup>1</sup> : J12-J18<br>Classical pneumonia codes: J12-J18                                                                                                                    | Diagnosis of reviewing physician based on chart review | HOSP              | Physician global assessment (PGA) | ≥18 yrs <sup>22</sup> |        |        | 93      |         |      |     |
|                                |                   |                                                                                         |                                                                |                   |                                                                                                                                                                                       |                                                        |                   |                                   |                       |        |        | 89      |         |      |     |

<sup>19</sup> From Royal Melbourne Hospital and Western Hospital Footscray<sup>20</sup> Identified if one or more of these codes appeared in any of the 14 diagnostic code positions for each hospital separation<sup>21</sup> (Between the 14 positions)<sup>22</sup> With immunocompromising conditions

Supplementary table 6

**Empyema**

**ICD-10**

|                           |             |                                                |                                   |              |                                                                                                                                    |                                                   |      |   |         |  |  |    |  |  |
|---------------------------|-------------|------------------------------------------------|-----------------------------------|--------------|------------------------------------------------------------------------------------------------------------------------------------|---------------------------------------------------|------|---|---------|--|--|----|--|--|
| Denmark, Sogaard 2011 [9] | 2000 - 2004 | Danish Civil Registry System, DNRP (discharge) | 1° or 2° (#) diagnosis of empyema | 1° or 2° (#) | <b>Codes<sup>1</sup>:</b> (J86.0, J86.9) <sup>23</sup><br><b>Related to respiratory system codes:</b> (J86.0, J86.9) <sup>24</sup> | Review of clinical, radiology and laboratory data | HOSP | 9 | ≥15 yrs |  |  | 95 |  |  |
|                           | 2005 - 2009 |                                                |                                   |              |                                                                                                                                    |                                                   |      |   |         |  |  | 87 |  |  |

**Community-acquired pneumonia**

**ICD-9**

|                        |                   |                                                                                                               |                                    |                                   |                                                                                                                                                                                                                                                                                                                                                                                                                                                                                                                                                                                                                                                                                                                                                                                  |                                       |      |                                                                                                                                                                |         |    |    |    |      |      |      |
|------------------------|-------------------|---------------------------------------------------------------------------------------------------------------|------------------------------------|-----------------------------------|----------------------------------------------------------------------------------------------------------------------------------------------------------------------------------------------------------------------------------------------------------------------------------------------------------------------------------------------------------------------------------------------------------------------------------------------------------------------------------------------------------------------------------------------------------------------------------------------------------------------------------------------------------------------------------------------------------------------------------------------------------------------------------|---------------------------------------|------|----------------------------------------------------------------------------------------------------------------------------------------------------------------|---------|----|----|----|------|------|------|
| USA, Whittle 1997 [10] | 07/1989 - 06/1990 | Discharge summaries, dictated admission notes, and radiology reports for each of these admissions (discharge) | CAP <sup>25</sup><br><sub>28</sub> | 1°<br>1°, or 2° (#) <sup>29</sup> | <b>Codes<sup>1</sup>:</b> 03.221, 21.21, 39.11, 52.11, 55.11, 73.01, 112.4, 114.01, 115.05, 115.15, 115.95, 130.41, 136.31, 480, 480.1, 480.2, 480.8, 480.9, 481, 482.0-482.4, 482.81, 482.9, 483, 484.1, 484.5x, 484.31, 484.61, 484.7, 484.81, 485, 486, 487.0, 507.0, 510.0, 510.91, 511.11, 513.0<br><b>Classical pneumonia codes:</b> 480, 480.1, 480.2, 480.8, 480.9, 481, 482.0-482.4, 482.81, 482.9, 483, 484.1, 484.5x, 484.31, 484.61, 484.7, 484.81, 485, 486, 487.0<br><b>Aspiration pneumonia codes:</b> 507.0<br><b>Other specific infection codes:</b> 3.221, 21.21, 39.11, 52.11, 55.11, 73.01, 112.4, 114.01, 115.05, 115.15, 115.95, 130.41, 136.31<br><b>Related to respiratory system codes:</b> (510.0, 510.9) <sup>26</sup> , (511.1, 513.0) <sup>27</sup> | Review of clinical and radiology data | HOSP | Symptoms present within 24 hr of admission and that the official reading of a chest radiograph performed within 48h of admission was consistent with pneumonia | ≥18 yrs | 84 | 86 | 92 |      | 6.00 | 0.19 |
|                        | 89                |                                                                                                               |                                    |                                   |                                                                                                                                                                                                                                                                                                                                                                                                                                                                                                                                                                                                                                                                                                                                                                                  |                                       |      |                                                                                                                                                                |         | 80 | 89 |    | 4.45 | 0.14 |      |

<sup>23</sup> Danish version of ICD-10 codes J86.0 Pyothorax with fistula and J86.9 Pyothorax without fistula

<sup>24</sup> Pyothorax with and without fistula

<sup>25</sup> CAP is considered when pneumonia diagnosis codes are in the main position, in other cases considered not CAP

<sup>26</sup> Empyema codes

<sup>27</sup> Other unspecified pneumonia-related codes

<sup>28</sup> If pneumonia is the main diagnosis or if pneumonia diagnosis is in other position and the principal diagnosis is related to pneumonia or several codes that are related to pneumonia (bacteremia, shock, respiratory failure, pneumothorax, congestive heart failure, volume depletion/electrolyte imbalance, disseminated intravascular coagulation, and chronic obstructive lung disease)

<sup>29</sup> If principal code is pneumonia-related

Supplementary table 6

|                                  |                   |                                                                                                                               |                                                                                                          |                        |                                                                                                                                                                                                                   |                                                                                        |      |                                                                                                     |         |    |    |    |    |      |      |
|----------------------------------|-------------------|-------------------------------------------------------------------------------------------------------------------------------|----------------------------------------------------------------------------------------------------------|------------------------|-------------------------------------------------------------------------------------------------------------------------------------------------------------------------------------------------------------------|----------------------------------------------------------------------------------------|------|-----------------------------------------------------------------------------------------------------|---------|----|----|----|----|------|------|
| Singapore Mukhopadhyay 2017 [16] | 01/2010 - 06/2012 | EMR-linked administrative data (admission and discharge)                                                                      | Admission diagnosis of pneumonia <sup>30</sup>                                                           | Not stated, likely any | <b>Codes<sup>1</sup>:</b> 480-487<br><b>Classical pneumonia codes:</b> 480-487                                                                                                                                    | Diagnosis of reviewing physician based on chart review                                 | HOSP | <sup>31</sup>                                                                                       | ≥21 yrs | 85 | 78 | 75 | 87 | 3.89 | 0.20 |
| USA, Schneeweiss 2007 [12]       | 03/2001 - 03/2004 | The Department of VA administrative database, EMRs (discharge)                                                                | ICD-9-CM for serious bacterial pneumonia                                                                 | 1°                     | <b>Codes<sup>1</sup>:</b> 3.22, 480.x-487.x, 513<br><b>Classical pneumonia codes:</b> 480.x-487.x<br><b>Other specific infection codes:</b> 3.22<br><b>Related to respiratory system codes:</b> 513 <sup>32</sup> | Diagnosis of reviewing physician based on chart review                                 | HOSP | <sup>33</sup>                                                                                       | ≥18 yrs |    |    | 70 |    |      |      |
|                                  |                   |                                                                                                                               |                                                                                                          |                        |                                                                                                                                                                                                                   | Based on diagnostic criteria from chart review (clinical, radiological and laboratory) |      |                                                                                                     |         |    |    | 70 |    |      |      |
| NL, van de Garde 2007 [13]       | 07/2000 - 03/2004 | Patient data from a randomized open label clinical trial <sup>34</sup> , hospital discharge records <sup>35</sup> (admission) | ICD-9-CM code was listed in the 1° or 2° (#) positions for each different patient category <sup>36</sup> | 1°                     | <b>Codes<sup>1</sup>:</b> 481-486<br><b>Classical pneumonia codes:</b> 481-486                                                                                                                                    | Review of medical files (clinical, radiological and laboratory data)                   | HOSP | Patients hospitalized for CAP, not given time frame. New or progressive infiltrate on a chest X-ray | ≥18 yrs | 72 |    |    |    |      |      |
|                                  |                   |                                                                                                                               |                                                                                                          | Any                    |                                                                                                                                                                                                                   |                                                                                        |      |                                                                                                     |         | 80 |    |    |    |      |      |

<sup>30</sup> Identified by text mining AND a proxy search term for pneumonia in the chest radiograph report AND discharge ICD-9-CM codes for pneumonia

<sup>31</sup> Chest radiograph on the date of admission, and no hospital discharge in the 14 days prior to the date of admission

<sup>32</sup> Other unspecified pneumonia-related codes

<sup>33</sup> Focus on infections that resulted in a hospital admission with a 1° discharge diagnosis of a bacterial or opportunistic infection, excluding nosocomial infections

<sup>34</sup> (July 2000 - March 2004) on efficacy of an early switch of intravenous antibacterial treatment to oral treatment of CAP

<sup>35</sup> From the medical registration department of the participating hospitals

<sup>36</sup> Pneumonia by pneumococcus, with other organism specified and no organism specified

Supplementary table 6

|                         |                   |                                                     |                                                                                                                                                                                                                       |                                                     |                                                                                                                                                                |                                                        |      |                                                                                            |                       |    |     |     |       |       |      |  |
|-------------------------|-------------------|-----------------------------------------------------|-----------------------------------------------------------------------------------------------------------------------------------------------------------------------------------------------------------------------|-----------------------------------------------------|----------------------------------------------------------------------------------------------------------------------------------------------------------------|--------------------------------------------------------|------|--------------------------------------------------------------------------------------------|-----------------------|----|-----|-----|-------|-------|------|--|
| USA, Grijalva 2008 [14] | 1995 - 2004       | Tennessee Medicaid (TennCare) databases (discharge) | Computerized definitions for events leading to hospitalization in TennCare patients (ICD-9-CM codes)                                                                                                                  | Any                                                 | <b>Codes<sup>1</sup>:</b> 480*, 481*, 482*, 483*, 484*, 485*, 486*, 487.0<br><b>Classical pneumonia codes:</b> 480*, 481*, 482*, 483*, 484*, 485*, 486*, 487.0 | Diagnosis by treating physician                        | HOSP | <sup>37</sup>                                                                              | ≥18 yrs <sup>38</sup> |    |     | 84  |       |       |      |  |
|                         |                   |                                                     |                                                                                                                                                                                                                       | 1°                                                  |                                                                                                                                                                |                                                        |      |                                                                                            |                       |    |     | 95  |       |       |      |  |
|                         |                   |                                                     |                                                                                                                                                                                                                       | 2° (#)                                              |                                                                                                                                                                |                                                        |      |                                                                                            |                       |    |     | 60  |       |       |      |  |
| USA, Yu 2011 [15]       | 01/1997 - 01/2005 | Administrative data systems (discharge)             | 1° discharge diagnosis code of pneumonia                                                                                                                                                                              | 1°                                                  | <b>Codes<sup>1</sup>:</b> 480-487 or 507.0<br><b>Classical pneumonia codes:</b> 480-487.0<br><b>Aspiration pneumonia codes:</b> 507.0                          | Diagnosis by treating physician                        | HOSP | Illness present at admission <sup>39</sup>                                                 | 18-64 yrs             | 63 | 93  | 91  | 68    | 9.00  | 0.40 |  |
|                         |                   |                                                     | As above OR in any position <sup>40</sup>                                                                                                                                                                             | Any                                                 |                                                                                                                                                                |                                                        |      |                                                                                            | ≥65 yrs               | 65 | 85  | 89  | 57    | 4.33  | 0.41 |  |
|                         |                   |                                                     | As above OR in any position <sup>41</sup>                                                                                                                                                                             |                                                     |                                                                                                                                                                |                                                        |      |                                                                                            | 18-64 yrs             | 81 | 82  | 84  | 78    | 4.50  | 0.23 |  |
|                         |                   |                                                     |                                                                                                                                                                                                                       |                                                     |                                                                                                                                                                |                                                        |      |                                                                                            | ≥65 yrs               | 89 | 63  | 82  | 75    | 2.41  | 0.17 |  |
| USA, Jones 2018 [17]    | 2006 - 2012       | VINCI (admission)                                   | For pneumonia coding using the 1°/principal ICD-9 code for pneumonia <sup>42</sup> , or a 2° (#) ICD-9 code for pneumonia and a 1°/principal ICD-9 code for sepsis <sup>43</sup> or respiratory failure <sup>44</sup> | 1° or 2° (#) if 1° is sepsis or respiratory failure | <b>Codes<sup>1</sup>:</b> 481-486<br><b>Classical pneumonia codes:</b> 481-486<br><b>Other specific infections codes:</b> Sepsis 038* (if pneumonia 2° (#))    | Diagnosis or pneumonia treatment by treating physician | HOSP | All visits to the USA Veterans Affairs (VA) EDs throughout the USA 2006-2012 <sup>45</sup> | ≥18 yrs               | 44 | 100 | 100 | 95    | ∞     | 0.56 |  |
|                         |                   | VINCI (discharge)                                   |                                                                                                                                                                                                                       |                                                     |                                                                                                                                                                |                                                        |      |                                                                                            |                       | 67 | 99  | 86  | 97    | 67.00 | 0.33 |  |
|                         |                   | VINCI (admission)                                   |                                                                                                                                                                                                                       | As above, plus NLP                                  |                                                                                                                                                                |                                                        |      |                                                                                            |                       |    |     |     |       |       |      |  |
|                         |                   |                                                     |                                                                                                                                                                                                                       |                                                     |                                                                                                                                                                |                                                        |      | ≥18 yrs                                                                                    | 89                    | 98 | 80  | 99  | 44.50 | 0.11  |      |  |

<sup>37</sup> Episodes of CAP were deemed as confirmed if pneumonia was considered the main reason for hospitalization on admission; and, at the end of the hospitalization, pneumonia was considered the main disease present at admission by the treating physician.

<sup>38</sup> with rheumatoid arthritis

<sup>39</sup> Hospitalizations due to causes other than pneumonia, including nosocomial pneumonia with pneumonia symptoms onset after hospital admission, were classified as 'not CAP'.

<sup>40</sup> Plus LOS ≤3 days (without code 507) OR LOS >3 days with ARF code as 1° (CART)

<sup>41</sup> (Without code 507), with LOS ≤9 days without an operation procedure code assigned to hospitalization

<sup>42</sup> (481–486)

<sup>43</sup> (038.0, 038.11, 038.12, 038.x, 995.91, 995.92, 785.52)

<sup>44</sup> (518.81–84, 799.1)

<sup>45</sup> That had chest imaging (computed tomography [CT] scan or chest X-ray) obtained within 24 hours of the visit time and at least one clinical document generated within 24 hours from the visit time with a standard note title consistent with an ED note or an addendum

Supplementary table 6

|                                   |                   |                                                                                                          |                                                                                                                                                                                                                                                                                    |                            |                                                                                                                                                                                                                                                                                                                                                                                 |                                                                                |                    |                             |                       |  |    |    |  |  |            |
|-----------------------------------|-------------------|----------------------------------------------------------------------------------------------------------|------------------------------------------------------------------------------------------------------------------------------------------------------------------------------------------------------------------------------------------------------------------------------------|----------------------------|---------------------------------------------------------------------------------------------------------------------------------------------------------------------------------------------------------------------------------------------------------------------------------------------------------------------------------------------------------------------------------|--------------------------------------------------------------------------------|--------------------|-----------------------------|-----------------------|--|----|----|--|--|------------|
| USA, Wiese 2018 [18]              | 2008 - 2012       | TennCare Tennessee Hospital Discharge Data System, pharmacy information from Medicare part D (discharge) | Pneumonia - 1° position <sup>46</sup><br>Pneumonia - 2° (#) position (1° diagnosis code with pneumonia diagnosis (above) in any other diagnosis field) <sup>47</sup>                                                                                                               | 1°                         | <b>Codes<sup>1</sup>:</b> 003.22, 480.x*, 481, 482.x, 483.x, 484.x, 485.x, 486.x, 487.0, 510.x, 038.x, 790.7, 995.91, 995.92<br><b>Classical pneumonia:</b> 480.x*, 481, 482.x, 483.x, 484.x, 485.x, 486.x, 487.0<br><b>Other specific infections codes:</b> 3.22 <sup>48</sup> , (038, 790.7, 995.91, 995.92) <sup>49</sup><br><b>Related to respiratory system codes:</b> 510 | Review of clinical, radiological, microbiological, and pharmacological data    | HOSP <sup>50</sup> | 50-110 yrs                  |                       |  | 97 |    |  |  |            |
|                                   |                   |                                                                                                          |                                                                                                                                                                                                                                                                                    |                            |                                                                                                                                                                                                                                                                                                                                                                                 | Radiological data                                                              |                    |                             |                       |  |    |    |  |  | 50-110 yrs |
| USA, Rodriguez-Barradas 2020 [19] | 06/2002 - 09/2008 | VACS survey cohort database (not stated)                                                                 | CAP such as bacterial <sup>51</sup> or viral pneumonia <sup>52</sup> (restricted CAP codes), and additional ICD-9 codes, consistent with miscellaneous lung infections <sup>53</sup><br><br>As above plus those that received antimicrobials within 72h of admission <sup>60</sup> | 1° or 2° (#) <sup>54</sup> | <b>Codes<sup>1</sup>:</b> 481-486, 480, 487, 506, 507, 510, 511.1<br><b>Classical pneumonia codes:</b> 481-486, 480, 487<br><b>Aspiration pneumonia codes:</b> 507.0<br><b>Related to respiratory system codes:</b> (510.0, 510.9) <sup>55</sup> , (506, 511.1) <sup>56</sup>                                                                                                   | Review of clinical, laboratory, and radiological data, antibiotic prescription | HOSP               | CAP within 48h of admission | ≥18 yrs <sup>57</sup> |  |    | 72 |  |  |            |
|                                   |                   |                                                                                                          |                                                                                                                                                                                                                                                                                    |                            |                                                                                                                                                                                                                                                                                                                                                                                 |                                                                                |                    |                             | ≥18 yrs <sup>58</sup> |  |    | 74 |  |  |            |
|                                   |                   |                                                                                                          |                                                                                                                                                                                                                                                                                    |                            |                                                                                                                                                                                                                                                                                                                                                                                 |                                                                                |                    |                             | ≥18 yrs <sup>59</sup> |  |    | 66 |  |  |            |
|                                   |                   |                                                                                                          |                                                                                                                                                                                                                                                                                    |                            |                                                                                                                                                                                                                                                                                                                                                                                 |                                                                                |                    |                             | ≥18 yrs <sup>57</sup> |  |    | 74 |  |  |            |
|                                   |                   |                                                                                                          |                                                                                                                                                                                                                                                                                    |                            |                                                                                                                                                                                                                                                                                                                                                                                 |                                                                                |                    |                             | ≥18 yrs <sup>58</sup> |  |    | 76 |  |  |            |
|                                   |                   |                                                                                                          |                                                                                                                                                                                                                                                                                    |                            |                                                                                                                                                                                                                                                                                                                                                                                 |                                                                                |                    |                             | ≥18 yrs <sup>59</sup> |  |    | 69 |  |  |            |
|                                   |                   |                                                                                                          | Any                                                                                                                                                                                                                                                                                |                            | <b>Codes<sup>1</sup>:</b> 480-487                                                                                                                                                                                                                                                                                                                                               |                                                                                |                    |                             |                       |  | 74 |    |  |  |            |

<sup>46</sup> (003.22, 480.x\*, 481, 482.x, 483.x, 484.x, 485.x, 486.x, 487.0)

<sup>47</sup> (510.x, 038.x, 790.7, 995.91, 995.92)

<sup>48</sup> Bacterial pathogen-specific pneumonia

<sup>49</sup> sSepsis, septicemia (if pneumonia 2° (#))

<sup>50</sup> The reviews were focused on clinical, microbiological, and radiological information from the 2 days prior to the admission date through 2 days after admission to limit the possibility of identifying infections that developed during the hospitalisation.

<sup>51</sup> (481-486)

<sup>52</sup> (480, 487)

<sup>53</sup> Including aspiration pneumonitis (507), inhalation (506), empyema (510), pleurisy (511.1), and lung abscess (513) and other infections associated with pneumonia and/or due to infection elsewhere, (3.22, 21.2, 39.1, 52.1, 55.1, 73, 517.1)

<sup>54</sup> If 1° is sepsis, respiratory failure, HIV or bacteremia if 1°

<sup>55</sup> Empyema codes

<sup>56</sup> Other unspecified pneumonia-related codes

<sup>57</sup> Overall

<sup>58</sup> With HIV

<sup>59</sup> And HIV-uninfected

<sup>60</sup> Identified by pharmacy package in EHR



Supplementary table 6

|  |  |                                                                                                                                                              |                           |                                                                                                                                                                                                                                  |  |  |  |                       |  |  |    |  |  |  |
|--|--|--------------------------------------------------------------------------------------------------------------------------------------------------------------|---------------------------|----------------------------------------------------------------------------------------------------------------------------------------------------------------------------------------------------------------------------------|--|--|--|-----------------------|--|--|----|--|--|--|
|  |  | Algorithm 1 <sup>61</sup>                                                                                                                                    |                           | <b>Classical pneumonia codes: 480-487</b>                                                                                                                                                                                        |  |  |  | ≥18 yrs <sup>58</sup> |  |  | 76 |  |  |  |
|  |  | Algorithm 1 plus those that received antimicrobials within 72h of admission <sup>60</sup>                                                                    |                           |                                                                                                                                                                                                                                  |  |  |  | ≥18 yrs <sup>59</sup> |  |  | 69 |  |  |  |
|  |  | Algorithm 1 plus 507 in any position                                                                                                                         |                           | <b>Codes<sup>1</sup>: 480-487, 507</b><br><b>Classical pneumonia codes: 480-487</b><br><b>Aspiration pneumonia codes: 507.0</b>                                                                                                  |  |  |  | ≥18 yrs <sup>57</sup> |  |  | 76 |  |  |  |
|  |  | Algorithm 1 plus 507 in any position plus those that received antimicrobials within 72h of admission <sup>60</sup><br><small>! Bookmark not defined.</small> |                           |                                                                                                                                                                                                                                  |  |  |  | ≥18 yrs <sup>58</sup> |  |  | 77 |  |  |  |
|  |  | Algorithm 2 <sup>62</sup>                                                                                                                                    | 1° or 2°(#) <sup>54</sup> | <b>Codes<sup>1</sup>: 480-487</b><br><b>Classical pneumonia codes: 480-487</b><br><b>Other specific infections codes: 038<sup>63</sup>, 042<sup>64</sup></b>                                                                     |  |  |  | ≥18 yrs <sup>59</sup> |  |  | 73 |  |  |  |
|  |  | Algorithm 2 <sup>62</sup> plus those that received antimicrobials within 72h of admission <sup>60</sup>                                                      |                           |                                                                                                                                                                                                                                  |  |  |  | ≥18 yrs <sup>57</sup> |  |  | 73 |  |  |  |
|  |  | Algorithm 2 <sup>62</sup> , plus 507                                                                                                                         |                           | <b>Codes<sup>1</sup>: 480-487</b><br><b>Classical pneumonia codes: 480-487</b><br><b>Aspiration pneumonia codes: 507.0</b><br><b>Other specific infections codes: 038<sup>63</sup>, 042<sup>64</sup></b>                         |  |  |  | ≥18 yrs <sup>58</sup> |  |  | 75 |  |  |  |
|  |  | Algorithm 2 <sup>62</sup> plus 428                                                                                                                           |                           | <b>Codes<sup>1</sup>: 480-487, 428</b><br><b>Classical pneumonia codes: 480-487</b><br><b>Other specific infection codes: 038<sup>63</sup>, 042<sup>64</sup></b><br><b>Related to respiratory system codes: 428<sup>56</sup></b> |  |  |  | ≥18 yrs <sup>59</sup> |  |  | 66 |  |  |  |
|  |  |                                                                                                                                                              |                           |                                                                                                                                                                                                                                  |  |  |  | ≥18 yrs <sup>57</sup> |  |  | 75 |  |  |  |
|  |  |                                                                                                                                                              |                           |                                                                                                                                                                                                                                  |  |  |  | ≥18 yrs <sup>58</sup> |  |  | 76 |  |  |  |
|  |  |                                                                                                                                                              |                           |                                                                                                                                                                                                                                  |  |  |  | ≥18 yrs <sup>59</sup> |  |  | 70 |  |  |  |
|  |  |                                                                                                                                                              |                           |                                                                                                                                                                                                                                  |  |  |  | ≥18 yrs <sup>57</sup> |  |  | 81 |  |  |  |
|  |  |                                                                                                                                                              |                           |                                                                                                                                                                                                                                  |  |  |  | ≥18 yrs <sup>58</sup> |  |  | 82 |  |  |  |
|  |  |                                                                                                                                                              |                           |                                                                                                                                                                                                                                  |  |  |  | ≥18 yrs <sup>59</sup> |  |  | 75 |  |  |  |
|  |  |                                                                                                                                                              |                           |                                                                                                                                                                                                                                  |  |  |  | ≥18 yrs <sup>57</sup> |  |  | 82 |  |  |  |
|  |  |                                                                                                                                                              |                           |                                                                                                                                                                                                                                  |  |  |  | ≥18 yrs <sup>58</sup> |  |  | 83 |  |  |  |
|  |  |                                                                                                                                                              |                           |                                                                                                                                                                                                                                  |  |  |  | ≥18 yrs <sup>59</sup> |  |  | 73 |  |  |  |
|  |  |                                                                                                                                                              |                           |                                                                                                                                                                                                                                  |  |  |  | ≥18 yrs <sup>57</sup> |  |  | 79 |  |  |  |
|  |  |                                                                                                                                                              |                           |                                                                                                                                                                                                                                  |  |  |  | ≥18 yrs <sup>58</sup> |  |  | 81 |  |  |  |
|  |  |                                                                                                                                                              |                           |                                                                                                                                                                                                                                  |  |  |  | ≥18 yrs <sup>59</sup> |  |  | 70 |  |  |  |
|  |  |                                                                                                                                                              |                           |                                                                                                                                                                                                                                  |  |  |  | ≥18 yrs <sup>57</sup> |  |  | 80 |  |  |  |
|  |  |                                                                                                                                                              |                           |                                                                                                                                                                                                                                  |  |  |  | ≥18 yrs <sup>58</sup> |  |  | 82 |  |  |  |
|  |  |                                                                                                                                                              |                           |                                                                                                                                                                                                                                  |  |  |  | ≥18 yrs <sup>59</sup> |  |  | 71 |  |  |  |

<sup>61</sup> 480-487 in any position

<sup>62</sup> 480-487 in 1° or 2°(#)<sup>54</sup> position only to selected diagnosis (a CAP-related code in 1° position with the exception that they could be in 2° (#) position if the following HIV, sepsis,

respiratory insufficiency, and bacteremia codes were in 1° position: 042, 038, 518.81, 518.82, 518.85, 995.91, 995.92, 790.7, 790.70)

<sup>63</sup> Sepsis (if pneumonia 2°(#))

<sup>64</sup> VIH (if pneumonia 2°(#))

Supplementary table 6

|  |  |                                                       |                                                                                                                                                                                                                                                                                                         |  |  |  |  |  |                       |  |  |    |  |  |  |
|--|--|-------------------------------------------------------|---------------------------------------------------------------------------------------------------------------------------------------------------------------------------------------------------------------------------------------------------------------------------------------------------------|--|--|--|--|--|-----------------------|--|--|----|--|--|--|
|  |  | Algorithm 2 <sup>62</sup><br>plus 491                 | <b>Codes<sup>1</sup>:</b> 480–487, 491<br><b>Classical pneumonia codes:</b> 480-487<br><b>Other specific infection codes:</b> 038 <sup>63</sup> , 042 <sup>64</sup><br><b>Related to respiratory system codes:</b> 491 <sup>56</sup>                                                                    |  |  |  |  |  | ≥18 yrs <sup>57</sup> |  |  | 81 |  |  |  |
|  |  | Algorithm 2 <sup>62</sup><br>plus 491, 428<br>and 507 | <b>Codes<sup>1</sup>:</b> 480–487, 491, 428 and 507<br><b>Classical pneumonia codes:</b> 480–487<br><b>Aspiration pneumonia codes:</b> 507.0<br><b>Other specific infection codes:</b> 038 <sup>63</sup> , 042 <sup>64</sup><br><b>Related to respiratory system codes:</b> (428,<br>491) <sup>65</sup> |  |  |  |  |  | ≥18 yrs <sup>57</sup> |  |  | 79 |  |  |  |
|  |  |                                                       |                                                                                                                                                                                                                                                                                                         |  |  |  |  |  | ≥18 yrs <sup>58</sup> |  |  | 82 |  |  |  |
|  |  |                                                       |                                                                                                                                                                                                                                                                                                         |  |  |  |  |  | ≥18 yrs <sup>59</sup> |  |  | 76 |  |  |  |
|  |  |                                                       |                                                                                                                                                                                                                                                                                                         |  |  |  |  |  | ≥18 yrs <sup>58</sup> |  |  | 81 |  |  |  |
|  |  |                                                       |                                                                                                                                                                                                                                                                                                         |  |  |  |  |  | ≥18 yrs <sup>59</sup> |  |  | 68 |  |  |  |

**Any hospital-acquired pneumonia**

**ICD-9**

|                              |                         |                                                                                    |                                                                                     |                                 |                                                                                                                                                                                                                                                                                                                                                                                                                                                                                                                                                                                                                                                                                                                                                                                                                                                      |                                                           |      |                                                                                          |                       |     |     |    |     |        |      |
|------------------------------|-------------------------|------------------------------------------------------------------------------------|-------------------------------------------------------------------------------------|---------------------------------|------------------------------------------------------------------------------------------------------------------------------------------------------------------------------------------------------------------------------------------------------------------------------------------------------------------------------------------------------------------------------------------------------------------------------------------------------------------------------------------------------------------------------------------------------------------------------------------------------------------------------------------------------------------------------------------------------------------------------------------------------------------------------------------------------------------------------------------------------|-----------------------------------------------------------|------|------------------------------------------------------------------------------------------|-----------------------|-----|-----|----|-----|--------|------|
| USA,<br>Romano<br>2002 [20]  | 01/1990<br>-<br>12/1991 | Medical<br>records and<br>OSHPD<br>Patient<br>Discharge<br>Data Set<br>(discharge) | Pneumonia or<br>empyema ICD-<br>9-CM                                                | Not<br>stated,<br>likely<br>any | <b>Codes<sup>1</sup>:</b> 480.x-487.0, 507.0, 510.x, 513.x<br><b>Classical pneumonia codes:</b> 480.x–487.0<br><b>Aspiration pneumonia codes:</b> 507.0<br><b>Related to respiratory system codes:</b> 510.x,<br>513.x                                                                                                                                                                                                                                                                                                                                                                                                                                                                                                                                                                                                                               | Recoding<br>based on<br>chart<br>review and<br>ICD manual | HOSP | Complica-<br>tions<br>secondary<br>to an<br>elective<br>lumbar<br>discec-<br>tomy        | ≥18 yrs <sup>66</sup> | 100 | 100 | 25 | 100 | 333.33 | 0.00 |
| Canada,<br>Quan<br>2004 [21] | 04/1996<br>-<br>03/1997 | Adminis-<br>trative<br>hospital<br>discharge<br>data<br>(discharge)                | ICD-9-CM<br>coding for<br>pneumonia<br>and 997.3 for<br>respiratory<br>complication | Any <sup>67</sup>               | <b>Codes<sup>1</sup>:</b> 481, 482.0–482.4, 480, 480.0, 480.1,<br>480.2, 480.8, 480.9, 487.0, 112.4, 114.0, 115.05,<br>115.15, 115.95, 484.6, 484.7, 136.3, 507.0, 482,<br>482.8, 482.9, 483, 484.1, 484.3, 484.5, 484.8,<br>73.0, 39.1, 55.1, 003.22, 130.4, 21.2, 52.1,<br>510.0, 510.9, 511.1, 513.0, 485, 486. 997.3<br><b>Classical pneumonia codes:</b> 480, 480.0, 480.1,<br>480.2, 480.8, 480.9, 481, 482 482.0-482.4,<br>482.8, 482.9, 483, 484.1, 484.3, 484.5, 484.8,<br>484.6, 484.7, 487.0<br><b>Aspiration pneumonia codes:</b> 507<br><b>Other specific infections codes:</b> 73.0, 3.22,<br>21.2, 39.1, 55.1, 52.1, 112.4, 114.0, 115.05,<br>115.15, 115.95, 130.4, 136.3<br><b>Related to respiratory system codes:</b> (510.0,<br>510.9) <sup>68</sup> , (511.1, 513.0) <sup>69</sup><br><b>Iatrogen/Complication codes:</b> 997.3 | Review of<br>medical<br>files and<br>recoding             | HOSP | Complica-<br>tion<br>diagnoses<br>arising<br>some time<br>after<br>hospital<br>admission | ≥18 yrs               | 35  | 99  | 50 | 99  | 58.33  | 0.65 |

<sup>65</sup> Other unspecified pneumonia-related codes

<sup>66</sup> Patients with elective lumbar discectomies

<sup>67</sup> (Up to 16 diagnoses)

<sup>68</sup> Empyema codes

<sup>69</sup> Other unspecified pneumonia-related codes

Supplementary table 6

| ICD-10                     |                   |                                                                       |                                                                                               |                                    |                                                                                                                                                                                                                                                                                                                                                                                                                                   |                                                                      |      |                                          |                         |    |     |    |        |      |
|----------------------------|-------------------|-----------------------------------------------------------------------|-----------------------------------------------------------------------------------------------|------------------------------------|-----------------------------------------------------------------------------------------------------------------------------------------------------------------------------------------------------------------------------------------------------------------------------------------------------------------------------------------------------------------------------------------------------------------------------------|----------------------------------------------------------------------|------|------------------------------------------|-------------------------|----|-----|----|--------|------|
| Germany, Azaouag 2008 [22] | 04/2005 - 09/2005 | A database of the University Hospital Essen <sup>70</sup> (discharge) | A 'case' if coded with at least one of these ICD-10-GM-2005 <sup>71</sup> codes <sup>72</sup> | Secondary diagnosis field          | <b>Codes</b> <sup>1</sup> : A48.1, B01.2, B05.2, B25.0, B59, J10.0, J11.0, J12, J13, J14, J15, J16, J17, J18, J68.0, J69, J82, J85.1<br><b>Classical pneumonia codes</b> : J10.0, J11.0, J12, J13, J14, J15, J16, J17, J18<br><b>Aspiration pneumonia codes</b> : J69<br><b>Other specific infections codes</b> : A48.1, B01.2, B05.2, B25.0, B59<br><b>Related to respiratory system codes</b> : (J68, J82, J85.1) <sup>73</sup> | Review of medical files (clinical, radiological and laboratory data) | HOSP | Nosocomial pneumonia, not specified time | ≥18 years <sup>74</sup> | 43 | 99  | 64 | 43.78  | 0.58 |
|                            |                   |                                                                       |                                                                                               |                                    |                                                                                                                                                                                                                                                                                                                                                                                                                                   |                                                                      |      |                                          |                         |    | 8   |    |        |      |
|                            |                   |                                                                       |                                                                                               |                                    |                                                                                                                                                                                                                                                                                                                                                                                                                                   |                                                                      |      |                                          |                         |    | 33  |    |        |      |
|                            |                   |                                                                       |                                                                                               |                                    |                                                                                                                                                                                                                                                                                                                                                                                                                                   |                                                                      |      |                                          |                         |    | 76  |    |        |      |
|                            |                   |                                                                       |                                                                                               |                                    |                                                                                                                                                                                                                                                                                                                                                                                                                                   |                                                                      |      |                                          |                         |    | 89  |    |        |      |
| Germany, Maass 2015 [23]   | 05/2010 - 12/2010 | Hospital administrative database                                      | Pneumonia ICD 10-GM codes (not specified in the paper) including HAP code                     | 2 <sup>o</sup> (#) diagnosis codes | <b>Codes</b> <sup>1</sup> : U69.00 <sup>75</sup> ; used pneumonia codes were not specified in the paper<br><b>latrogen/Complication codes</b> : U69.00 <sup>75</sup>                                                                                                                                                                                                                                                              | Review of medical files according to CDC criteria                    | HOSP | With a minimum hospitalization of 5 days | ≥65 yrs                 | 23 | 100 | 91 | 233.00 | 0.77 |
| Switzerland,               | 2016              | University Hospital                                                   | All patients assigned to the                                                                  | Not stated,                        | <b>Codes</b> <sup>1</sup> : U69.00 <sup>75</sup><br><b>latrogen/Complication codes</b> : U69.00 <sup>75</sup>                                                                                                                                                                                                                                                                                                                     | Review of clinical,                                                  | HOSP | Proxy code U69.00 as                     | ≥18 yrs                 | 59 | 98  |    | 32.78  | 0.42 |

<sup>70</sup> The database is mandatory (by law) and will be handed out to third parties e.g., health insurance companies

<sup>71</sup> German modification

<sup>72</sup> Which may not be present at admission or be the main diagnosis at discharge

<sup>73</sup> Other affections related to respiratory system

<sup>74</sup> With mixed comorbidities

<sup>75</sup> Hospital-acquired pneumonia

Supplementary table 6

|                         |  |                                             |                                                 |            |  |                                                              |  |                                                                           |  |  |  |  |  |  |  |  |  |
|-------------------------|--|---------------------------------------------|-------------------------------------------------|------------|--|--------------------------------------------------------------|--|---------------------------------------------------------------------------|--|--|--|--|--|--|--|--|--|
| Wolfensberger 2018 [24] |  | Zurich database, medical charts (discharge) | proxy code U69.00 as having a HAP <sup>76</sup> | likely any |  | radiological and laboratory data, based on HELICS definition |  | having a HAP according to ICD-10, pneumonia more than 48h after admission |  |  |  |  |  |  |  |  |  |
|-------------------------|--|---------------------------------------------|-------------------------------------------------|------------|--|--------------------------------------------------------------|--|---------------------------------------------------------------------------|--|--|--|--|--|--|--|--|--|

**Ventilator-associated pneumonia**

| ICD-9                      |                   |                                                                             |                                                                 |                        |                                                                                   |                                         |      |                                        |                       |    |     |     |      |       |      |
|----------------------------|-------------------|-----------------------------------------------------------------------------|-----------------------------------------------------------------|------------------------|-----------------------------------------------------------------------------------|-----------------------------------------|------|----------------------------------------|-----------------------|----|-----|-----|------|-------|------|
| Belgium, Verelst 2010 [25] | 2004 - 2006       | B-HDDS <sup>77</sup> (admission)                                            | ICD-9-CM pneumonia* in any 2° (#) diagnosis field <sup>78</sup> | 2°                     | Codes <sup>1</sup> : 997.3<br>Iatrogen/Complications codes: 997.31 <sup>79</sup>  | Review of medical files                 | HOSP | Associated with mechanical ventilation | ≥16 yrs <sup>80</sup> |    |     | 30  | 99   |       |      |
|                            | 2004 - 2006       | B-HDDS <sup>77</sup> (not present at admission)                             |                                                                 |                        |                                                                                   |                                         |      |                                        | ≥16 yrs <sup>81</sup> |    |     | 30  | 99   |       |      |
| USA, Cass 2013 [26]        | 01/2009 - 12/2009 | Administrative and hospital surveillance data <sup>82,83</sup> (not stated) | Restricted definition for VAP <sup>84</sup>                     | Not stated, likely any | Codes <sup>1</sup> : 997.31<br>Iatrogen/Complications codes: 997.31 <sup>79</sup> | As defined by the hospital surveillance | ICU  | <sup>85</sup>                          | ≥18 yrs               | 25 | 100 | 28  | 100  | 83.33 | 0.75 |
|                            | 01/2009 - 12/2009 | Expanded definition for VAP <sup>86</sup>                                   | ≥18 yrs                                                         |                        |                                                                                   |                                         |      |                                        | 61                    | 93 | 4   | 100 | 9.06 | 0.42  |      |

<sup>76</sup> According to ICD-10 definition criteria (ICD-HAP)

<sup>77</sup> Has been compulsory for all in-patients in acute hospitals in Belgium

<sup>78</sup> AND a Belgian nomenclature code for artificial ventilation (211046)

<sup>79</sup> Ventilator-associated pneumonia

<sup>80</sup> Data present on admission files

<sup>81</sup> Data not present on admission files

<sup>82</sup> 3M Health Information Systems ClinTrac Abstracting Module

<sup>83</sup> From Greenville Memorial Hospital

<sup>84</sup> Diagnosis code 997.31: VAP; negative POA field

<sup>85</sup> Administrative data indicated an infection not present on admission, infection acquired during their hospitalization

<sup>86</sup> With 30 diagnosis codes (plus negative POA field)

Supplementary table 6

|                         |                                                   |                                                                                                                                                                                                                                                                                                                                                                                                                                                                                                                                                                               |                       |    |    |    |    |       |      |
|-------------------------|---------------------------------------------------|-------------------------------------------------------------------------------------------------------------------------------------------------------------------------------------------------------------------------------------------------------------------------------------------------------------------------------------------------------------------------------------------------------------------------------------------------------------------------------------------------------------------------------------------------------------------------------|-----------------------|----|----|----|----|-------|------|
| 01/2009<br>-<br>12/2009 | Restricted<br>definition for<br>VAP <sup>87</sup> | <b>Codes<sup>1</sup>: 997.31</b><br><b>latrogen/Complications codes: 997.31<sup>79</sup></b>                                                                                                                                                                                                                                                                                                                                                                                                                                                                                  | ≥18 yrs <sup>88</sup> | 25 | 99 | 28 | 99 | 20.83 | 0.76 |
|                         | Expanded<br>definition for<br>VAP <sup>89</sup>   | <b>Codes<sup>1</sup>: 480.0, 480.1, 480.2, 480.3, 480.8,</b><br>480.9, 481, 482.0, 482.1, 482.2, 482.30, 482.31,<br>482.32, 482.39, 482.40, 482.41, 482.49, 482.81,<br>482.82, 482.83, 482.84, 482.89, 482.9, 483.0,<br>483.1, 483.8, 485, 486, 487.0, 997.31<br><b>Classical pneumonia codes: 480.0, 480.1, 480.2,</b><br>480.3, 480.8, 480.9, 481, 482.0, 482.1, 482.2,<br>482.30, 482.31, 482.32, 482.39, 482.40, 482.41,<br>482.49, 482.81, 482.82, 482.83, 482.84, 482.89,<br>482.9, 483.0, 483.1, 483.8, 485, 486, 487.0<br><b>latrogen/Complications codes: 997.31</b> |                       | 61 | 83 | 6  | 99 | 3.55  | 0.47 |

<sup>87</sup> Diagnosis code 997.31: VAP; negative POA field for population which required continuous invasive mechanical ventilation

<sup>88</sup> Mechanically ventilated patient

<sup>89</sup> With 30 diagnosis codes (plus negative POA field) for population which required continuous invasive mechanical ventilation

Supplementary table 7

**Supplementary table 7. Characteristics and validation measures of ICD-9 algorithms to diagnose pathogen-specific LRTI in adults**

| Country, reference, data source                                                          | Algorithm and coding position                                                                                                                                                                                                                                | Codes        | Pathogen                        | Reference standard                                                 | Se (%) | Sp (%) | PPV (%) | NPV (%) | True pos. | False neg. | False pos. | True neg. | Sample size (reference) | Pr.  | LR+   | LR- |
|------------------------------------------------------------------------------------------|--------------------------------------------------------------------------------------------------------------------------------------------------------------------------------------------------------------------------------------------------------------|--------------|---------------------------------|--------------------------------------------------------------------|--------|--------|---------|---------|-----------|------------|------------|-----------|-------------------------|------|-------|-----|
| <b>Pneumonia</b>                                                                         |                                                                                                                                                                                                                                                              |              |                                 |                                                                    |        |        |         |         |           |            |            |           |                         |      |       |     |
| USA, (Higgins, 2020 [8]), data from 178 US hospitals in the Premier Healthcare Database  | Primary diagnosis of pneumonia or a primary diagnosis of respiratory failure (ICD-9-CM codes: 518.81, 518.82, 518.84, and 799.1) or sepsis (ICD-9-CM codes: 785.52, 790.7, 995.91, 995.92, and 038.0-038.9) combined with a secondary diagnosis of pneumonia | 482.41       | MSSA                            | Blood or respiratory culture, urinary antigen, or PCR              | 14.2   | 99.9   | 91.1    | 95.4    | 1233      | 7454       | 120        | 152722    | 161529                  | 0.8  | 142.0 | 0.9 |
|                                                                                          |                                                                                                                                                                                                                                                              | 482.42       |                                 |                                                                    | 49.3   | 99.4   | 76      | 98.1    | 2849      | 2936       | 898        | 154379    | 161062                  | 1.8  | 82.2  | 0.5 |
|                                                                                          |                                                                                                                                                                                                                                                              | 481, 482.30  | <i>Streptococcus pneumoniae</i> |                                                                    | 60.1   | 99.2   | 73.4    | 98.5    | 3525      | 2345       | 1280       | 154668    | 161818                  | 2.2  | 75.1  | 0.4 |
|                                                                                          |                                                                                                                                                                                                                                                              | 482.1        | <i>Pseudomonas</i> spp          |                                                                    | 46.9   | 99.7   | 80.3    | 98.5    | 2052      | 2321       | 505        | 156651    | 161529                  | 1.3  | 156.3 | 0.5 |
|                                                                                          |                                                                                                                                                                                                                                                              | 482.82       | <i>Escherichia coli</i>         |                                                                    | 17.3   | 100.0  | 88.7    | 98.4    | 557       | 2661       | 71         | 158240    | 161529                  | 0.3  |       | 0.8 |
|                                                                                          |                                                                                                                                                                                                                                                              | 482          | <i>Klebsiella pneumoniae</i>    |                                                                    | 35.7   | 99.9   | 79.1    | 99.1    | 774       | 1396       | 205        | 159154    | 161529                  | 0.5  | 357.0 | 0.6 |
|                                                                                          |                                                                                                                                                                                                                                                              | 482.2        | <i>Haemophilus influenzae</i>   |                                                                    | 42.8   | 99.9   | 84.7    | 99.4    | 708       | 946        | 128        | 159747    | 161529                  | 0.4  | 428.0 | 0.6 |
|                                                                                          |                                                                                                                                                                                                                                                              | 483          | <i>Mycoplasma pneumoniae</i>    |                                                                    | 53.5   | 99.8   | 61.8    | 99.7    | 564       | 491        | 348        | 160126    | 161529                  | 0.3  | 267.5 | 0.5 |
|                                                                                          |                                                                                                                                                                                                                                                              | 482.84       | <i>Legionella</i> spp           |                                                                    | 78.4   | 99.9   | 82.5    | 99.9    | 486       | 134        | 103        | 160806    | 161529                  | 0.3  | 784.0 | 0.2 |
|                                                                                          |                                                                                                                                                                                                                                                              | 487.x, 488.x | Influenza virus                 |                                                                    | 95.9   | 98.9   | 70.8    | 99.9    | 4168      | 178        | 1723       | 155460    | 161529                  | 2.6  | 87.2  | 0.0 |
|                                                                                          |                                                                                                                                                                                                                                                              | 480.1        | RSV                             |                                                                    | 24.1   | 100    | 67.2    | 99.9    | 41        | 129        | 20         | 161339    | 161529                  | 0.0  |       | 0.8 |
| 480.2                                                                                    | Parainfluenza virus                                                                                                                                                                                                                                          | 14           | 100                             | 57.1                                                               | 99.9   | 20     | 123     | 15      | 161371    | 161529     | 0.0        |           | 0.9                     |      |       |     |
| <b>Community-acquired pneumonia</b>                                                      |                                                                                                                                                                                                                                                              |              |                                 |                                                                    |        |        |         |         |           |            |            |           |                         |      |       |     |
| USA, (Guevara, 1999 [11]), data from a community-based pneumonia incidence study in Ohio | ICD-9-CM code in first position                                                                                                                                                                                                                              | 481          | <i>S. pneumoniae</i>            | <b>Class 1: Definite</b><br>(Isolated from blood or pleural fluid) | 0      | 97.8   | 56.8    | 96.6    | 109       |            | 83         |           | 330                     | 33.0 | 20.6  | 0.6 |
|                                                                                          | ICD-9-CM code in 1-5 position                                                                                                                                                                                                                                |              |                                 |                                                                    | 58.3   | 97.5   | 59.1    | 97.4    | 140       |            | 97         |           | 394                     | 35.5 | 23.3  | 0.4 |
|                                                                                          | ICD-9-CM code in first position                                                                                                                                                                                                                              | 482.3        |                                 |                                                                    | 6.7    | 99.2   | 34.8    | 94.4    | 16        |            | 30         |           | 93                      | 17.2 | 8.4   | 0.9 |
|                                                                                          | ICD-9-CM code in 1-5 position                                                                                                                                                                                                                                |              |                                 |                                                                    | 11.3   | 99.0   | 40.3    | 94.7    | 27        |            | 40         |           | 119                     | 22.7 | 11.3  | 0.9 |
|                                                                                          | ICD-9-CM code in first position                                                                                                                                                                                                                              | 486          |                                 |                                                                    | 10.8   | 54.8   | 1.5     | 90.7    | 26        |            | 1727       |           | 1803                    | 1.4  | 0.2   | 1.6 |
|                                                                                          | ICD-9-CM code in 1-5 position                                                                                                                                                                                                                                |              |                                 |                                                                    | 14.2   | 48.4   | 1.7     | 90.0    | 34        |            | 1975       |           | 2062                    | 1.6  | 0.3   | 1.8 |
|                                                                                          | ICD-9-CM code in 1-5 position, Group 2: group 1 + 481.00                                                                                                                                                                                                     | 38.2, 481.00 |                                 |                                                                    | 64.2   | 97.4   | 60.9    | 97.7    | 186       |            | 99         |           | 443                     | 42.0 | 24.8  | 0.4 |

Supplementary table 7

| Country, reference, data source                                                                                                              | Algorithm and coding position                            | Codes                                       | Pathogen                                | Reference standard                                                                                                                                                                                                                  | Se (%) | Sp (%) | PPV (%) | NPV (%) | True pos. | False neg. | False pos. | True neg. | Sample size (reference) | Pr.  | LR+  | LR- |  |
|----------------------------------------------------------------------------------------------------------------------------------------------|----------------------------------------------------------|---------------------------------------------|-----------------------------------------|-------------------------------------------------------------------------------------------------------------------------------------------------------------------------------------------------------------------------------------|--------|--------|---------|---------|-----------|------------|------------|-----------|-------------------------|------|------|-----|--|
|                                                                                                                                              | ICD-9-CM code in 1-5 position, Group 3: Group 2 + 38.00  | 38.2, 481.00, 38.00                         |                                         |                                                                                                                                                                                                                                     | 76.7   | 97.0   | 61.3    | 98.5    | 235       |            | 116        |           | 510                     | 46.1 | 25.3 | 0.2 |  |
|                                                                                                                                              | ICD-9-CM code in 1-5 position, Group 4: Group 3 + 482.30 | 38.2, 481.00, 38.00, 482.30                 |                                         |                                                                                                                                                                                                                                     | 81.3   | 96.1   | 56.4    | 98.8    | 262       |            | 156        |           | 629                     | 41.7 | 20.6 | 0.2 |  |
|                                                                                                                                              | ICD-9-CM code in 1-5 position, Group 5: Group 4 + 518.81 | 38.2, 481.00, 38.00, 482.30, 518.81         |                                         |                                                                                                                                                                                                                                     | 81.3   | 96.0   | 56.2    | 98.8    | 298       |            |            |           | 1035                    | 28.8 | 20.5 | 0.2 |  |
|                                                                                                                                              | ICD-9-CM code in 1-5 position, Group 6: Group 5 + 486.00 | 38.2, 481.00, 38.00, 482.30, 518.81, 486.00 |                                         |                                                                                                                                                                                                                                     | 89.2   | 44.5   | 9.2     | 98.5    | 332       |            |            |           | 3097                    | 10.7 | 1.6  | 0.2 |  |
| NL, (van de Garde, 2007 [13], patient data from a randomized open label clinical trial <sup>a</sup> Hospital discharge record <sup>b</sup> ) | ICD-9 codes, position not stated, likely any             | 481                                         | <i>S. pneumoniae</i>                    | Sputum samples and blood samples were collected, cultured, and evaluated following standard procedures. In addition, Binax NOW-tests were used to detect urinary antigen for <i>Legionella pneumophila</i> and <i>S. pneumoniae</i> | 35     |        |         |         |           |            |            |           | 293                     |      |      |     |  |
|                                                                                                                                              |                                                          | 482.x, 483.x                                | Pneumonia with other organism specified |                                                                                                                                                                                                                                     | 18.3   |        |         |         |           |            |            |           |                         | 293  |      |     |  |
|                                                                                                                                              |                                                          | 485-486                                     | Pneumonia, organism unspecified         |                                                                                                                                                                                                                                     | 62.6   |        |         |         |           |            |            |           |                         |      | 293  |     |  |

<sup>a</sup> on efficacy of an early switch of intravenous antibacterial treatment to oral treatment of CAP; <sup>b</sup> from the medical registration department of the participating hospitals; CAP, community-acquired pneumonia; neg, negative; CM: clinical modifications; ICD, international classification of diseases; LR+: Likelihood ratio positive; LR-: Likelihood ratio negative; LRTI, lower respiratory tract infection; MSSA, Methicillin-sensitive *Staphylococcus aureus*; NL, The Netherlands; NPV, negative predictive value; pos, positive; PPV, positive predictive value; Pr, prevalence; RSV, respiratory syncytial virus; Se, sensitivity; Sp, specificity; USA, United States of America

**Supplementary figure 1. Results of the risk of bias assessment, QUADAS-2 adapted tool**

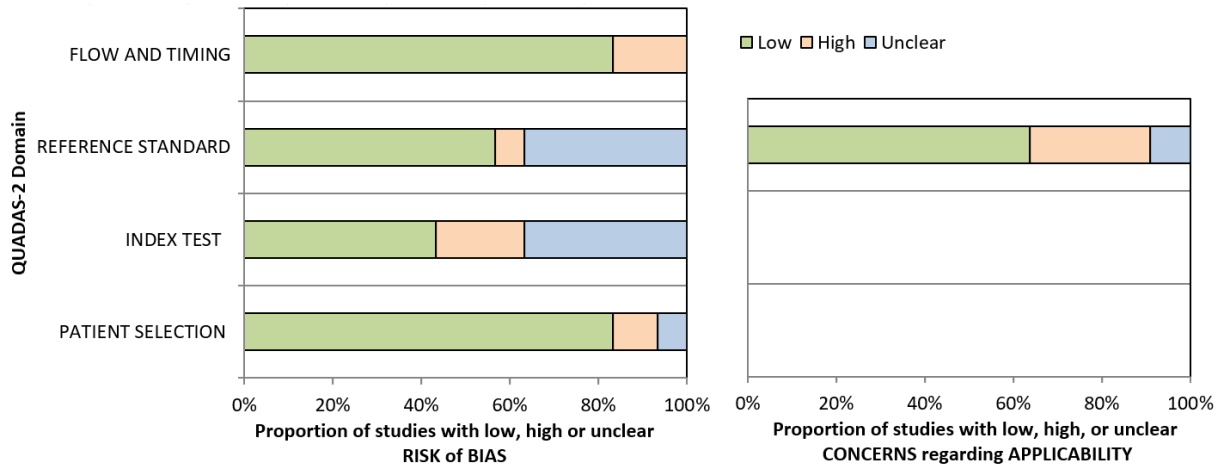



## References for supplementary material

1. Henriksen DP, Nielsen SL, Laursen CB, Hallas J, Pedersen C, Lassen AT. How well do discharge diagnoses identify hospitalised patients with community-acquired infections?--a validation study. *PLoS One*. 2014;9(3):e92891. <https://doi.org/10.1371/journal.pone.0092891>
2. Rattanaumpawan P, Wongkamhla T, Thamlikitkul V. Accuracy of ICD-10 coding system for identifying comorbidities and infectious conditions using data from a Thai university hospital administrative database. *J Med Assoc Thailand*. 2016;99(4):368-73.
3. Aronsky D, Haug PJ, Lagor C, Dean NC. Accuracy of administrative data for identifying patients with pneumonia. *Am J Med Qual*. 20(6):319-28. <https://doi.org/10.1177/1062860605280358>
4. Skull SA, Andrews RM, Byrnes GB, et al. ICD-10 codes are a valid tool for identification of pneumonia in hospitalized patients aged > or = 65 years. *Epidemiol Infect*. 2008;136(2):232-40. <https://doi.org/10.1017/S0950268807008564>.
5. Ahmed A, Thongprayoon C, Pickering BW, et al. Towards prevention of acute syndromes: electronic identification of at-risk patients during hospital admission. *Appl Clin Inform*. 2014;5(1):58-72. <https://doi.org/10.4338/ACI-2013-07-RA-0045>.
6. Holland-Bill L, Xu H, Sørensen HT, et al. Positive predictive value of primary inpatient discharge diagnoses of infection among cancer patients in the Danish National Registry of Patients. *Ann Epidemiol*. 2014;24(8):593-7. <https://doi.org/10.1016/j.annepidem.2014.05.011>.
7. Kern DM, Davis J, Williams SA, et al. Validation of an administrative claims-based diagnostic code for pneumonia in a US-based commercially insured COPD population. *Int J Chron Obstruct Pulmon Dis*. 2015;10:1417-25. <https://doi.org/10.2147/COPD.S83135>.
8. Higgins TL, Deshp, e A, et al. Assessment of the Accuracy of Using ICD-9 Diagnosis Codes to Identify Pneumonia Etiology in Patients Hospitalized With Pneumonia. *JAMA Netw Open*. 2020;3(7):e207750. <https://doi.org/10.1001/jamanetworkopen.2020.7750>.
9. Søggaard M, Kornum JB, Schønheyder HC, Thomsen RW. Positive predictive value of the ICD-10 hospital diagnosis of pleural empyema in the Danish National Registry of Patients. *Clin Epidemiol*. 2011;3:85-9. <https://doi.org/10.2147/CLEP.S16931>
10. Whittle J, Fine MJ, Joyce DZ, et al. Community-acquired pneumonia: can it be defined with claims data? *Am J Med Qual*. 1997;12(4):187-93. <https://doi.org/10.1177/0885713X9701200404>.
11. Guevara RE, Butler JC, Marston BJ, Plouffe JF, File TM, Jr., Breiman RF. Accuracy of ICD-9-CM codes in detecting community-acquired pneumococcal pneumonia for incidence and vaccine efficacy studies. *Am J Epidemiol*. 1999;149(3):282-9. <https://doi.org/10.1093/oxfordjournals.aje.a009804>.
12. Schneeweiss S, Robicsek A, Scranton R, Zuckerman D, Solomon DH. Veteran's affairs hospital discharge databases coded serious bacterial infections accurately. *J Clin Epidemiol*. 2007;60(4):397-409. <https://doi.org/10.1016/j.jclinepi.2006.07.011>.
13. van de Garde EMW, Oosterheert JJ, Bonten M, Kaplan RC, Leufkens HGM. International classification of diseases codes showed modest sensitivity for detecting community-acquired pneumonia. *J Clin Epidemiol*. 2007;60(8):834-8. <https://doi.org/10.1016/j.jclinepi.2006.10.018>.
14. Grijalva CG, Chung CP, Stein CM, et al. Computerized definitions showed high positive predictive values for identifying hospitalizations for congestive heart failure and selected infections in Medicaid enrollees with rheumatoid arthritis. *Pharmacoepidemiol Drug Saf*. 2008;17(9):890-5. <https://doi.org/10.1002/pds.1625>.
15. Yu O, Nelson JC, Bounds L, Jackson LA. Classification algorithms to improve the accuracy of identifying patients hospitalized with community-acquired pneumonia using administrative data. *Epidemiol Infect*. 2011;139(9):1296-306. <https://doi.org/10.1017/S0950268810002529>.

## References for supplementary material

16. Mukhopadhyay A, Maliapen M, Ong V, et al. Community-acquired pneumonia case validation in an anonymized electronic medical record-linked expert system. *Clin Infect Dis*. 2017;64:S141-S4. <https://doi.org/10.1093/cid/cix020>.
17. Jones BE, South BR, Shao Y, et al. Development and Validation of a Natural Language Processing Tool to Identify Patients Treated for Pneumonia across VA Emergency Departments. *Appl Clin Inform*. 2018;9(1):122-8. <https://doi.org/10.1055/s-0038-1626725>.
18. Wiese AD, Griffin MR, Stein CM, et al. Validation of discharge diagnosis codes to identify serious infections among middle age and older adults. *BMJ Open*. 2018;8(6):e020857. <https://doi.org/10.1136/bmjopen-2017-020857>.
19. Rodriguez-Barradas MC, McGinnis KA, Akgün K, et al. Validation for using electronic health records to identify community acquired pneumonia hospitalization among people with and without HIV. *Pneumonia (Nathan)*. 2020;12:6. <https://doi.org/10.1186/s41479-020-00068-1>.
20. Romano P, Chan B, Schembri M, Rainwater J. Can Administrative Data Be Used to Compare Postoperative Complication Rates Across Hospitals? *Medical care*. 2002;40:856-67. <https://doi.org/10.1097/01.MLR.0000027452.96163.A4>.
21. Quan H, Parsons GA, Ghali WA. Assessing accuracy of diagnosis-type indicators for flagging complications in administrative data. *J Clin Epidemiol*. 2004;57(4):366-72. <https://doi.org/10.1016/j.jclinepi.2003.01.002>
22. Azaouagh A, Stausberg J. [Frequency of hospital-acquired pneumonia--comparison between electronic and paper-based patient records]. *Pneumologie*. 2008;62(5):273-8. <https://doi.org/10.1055/s-2008-1038099>.
23. Maass C, Kuske S, Lessing C, Schrappe M. Are administrative data valid when measuring patient safety in hospitals? A comparison of data collection methods using a chart review and administrative data. *Int J Qual Health Care*. 2015;27(4):305-13. <https://doi.org/10.1093/intqhc/mzv045>
24. Wolfensberger A, Meier AH, Kuster SP, Mehra T, Meier MT, Sax H. Should International Classification of Diseases codes be used to survey hospital-acquired pneumonia? *J Hosp Infect*. 2018;99(1):81-4. <https://doi.org/10.1016/j.jhin.2018.01.017>
25. Verelst S, Jacques J, Van den Heede K, et al. Validation of Hospital Administrative Dataset for adverse event screening. *Qual Saf Health Care*. 2010;19(5):e25. <https://doi.org/10.1136/qshc.2009.034306>.
26. Cass AL, Kelly JW, Probst JC, Addy CL, McKeown RE. Identification of device-associated infections utilizing administrative data. *Am J Infect Control*. 2013;41(12):1195-9. <https://doi.org/10.1016/j.ajic.2013.03.295>.
